# Supplementary material for: Filtration of the preferred catalyst for reverse water-gas shift among Rhn−(n= 3–11) clusters by mass spectrometry under variable temperatures
Source: Royal Society of Chemistry journal article supplement (doi:10.1039/d3dt00802a), 2023-01-01
Supplement: d3dt00802a1.pdf [file d3dt00802a1.pdf]

## Supporting Information for

### Filtration of the preferred catalyst for reverse water-gas shift among the $\text{Rh}_n^-$ ( $n = 3-11$ ) clusters by mass spectrometry under variable temperatures

Yun-Zhu Liu,<sup>a,c,d</sup> Xing-Yue He,<sup>b</sup> Jiao-Jiao Chen,<sup>a,d</sup> Zhong-Pu Zhao,<sup>a,d</sup> Xiao-Na Li,<sup>\*,a,d</sup> and  
Sheng-Gui He<sup>\*,a,c,d</sup>

<sup>a</sup> *State Key Laboratory for Structural Chemistry of Unstable and Stable Species, Institute of Chemistry, Chinese Academy of Sciences, Beijing 100190, China*

<sup>b</sup> *Key Laboratory of Chemical Biology of Hebei Province, College of Chemistry and Environmental Science, Hebei University, Baoding, Hebei, 071002, P.R. China.*

<sup>c</sup> *University of Chinese Academy of Sciences, Beijing 100049, China*

<sup>d</sup> *Beijing National Laboratory for Molecular Sciences and CAS Research/Education Center of Excellence in Molecular Sciences, Beijing 100190, China*

\*Corresponding authors. E-mail: [lxn@iccas.ac.cn](mailto:lxn@iccas.ac.cn); [shengguihe@iccas.ac.cn](mailto:shengguihe@iccas.ac.cn)

Phone: +86-10-62536990; Fax: +86-10-62559373

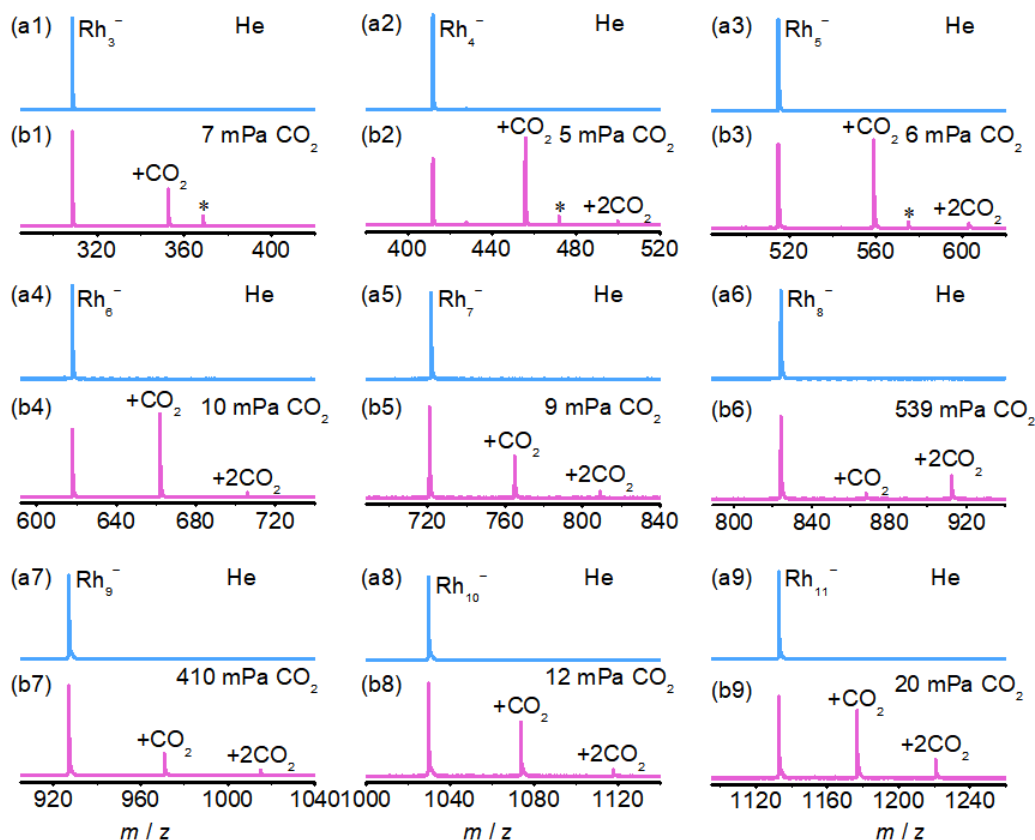

**Fig. S1** The time-of-flight (TOF) mass spectra for the reactions of mass-selected  $\text{Rh}_n^-$  ( $n = 3-11$ ) clusters (a) with  $\text{CO}_2$  (b) at 298 K. The reactant pressures are given in mPa ( $= 10^{-3}$  Pa). The reaction times are 1.8 ms for  $\text{Rh}_n^-$  ( $n = 3-7, 9-11$ ) +  $\text{CO}_2$  and 3.8 ms for  $\text{Rh}_8^-$  +  $\text{CO}_2$ . The  $\text{Rh}_n\text{X}^-$  ( $\text{X} = \text{CO}_2$  and  $2\text{CO}_2$ ) species are labeled as +X. The signals marked with asterisks are  $\text{ORh}_n\text{CO}_2^-$  ( $n = 3-5$ ) ( $\text{Rh}_n\text{CO}_2^- + \text{CO}_2 \rightarrow \text{ORh}_n\text{CO}_2^- + \text{CO}$ ).

Note that in the temperature-variable experiments, molecule density of reactants ( $\text{CO}_2$  and  $\text{H}_2$ ) was used, while for the reactions performed under the same temperature, reactant pressure (in Pa or mPa) was used in this paper.

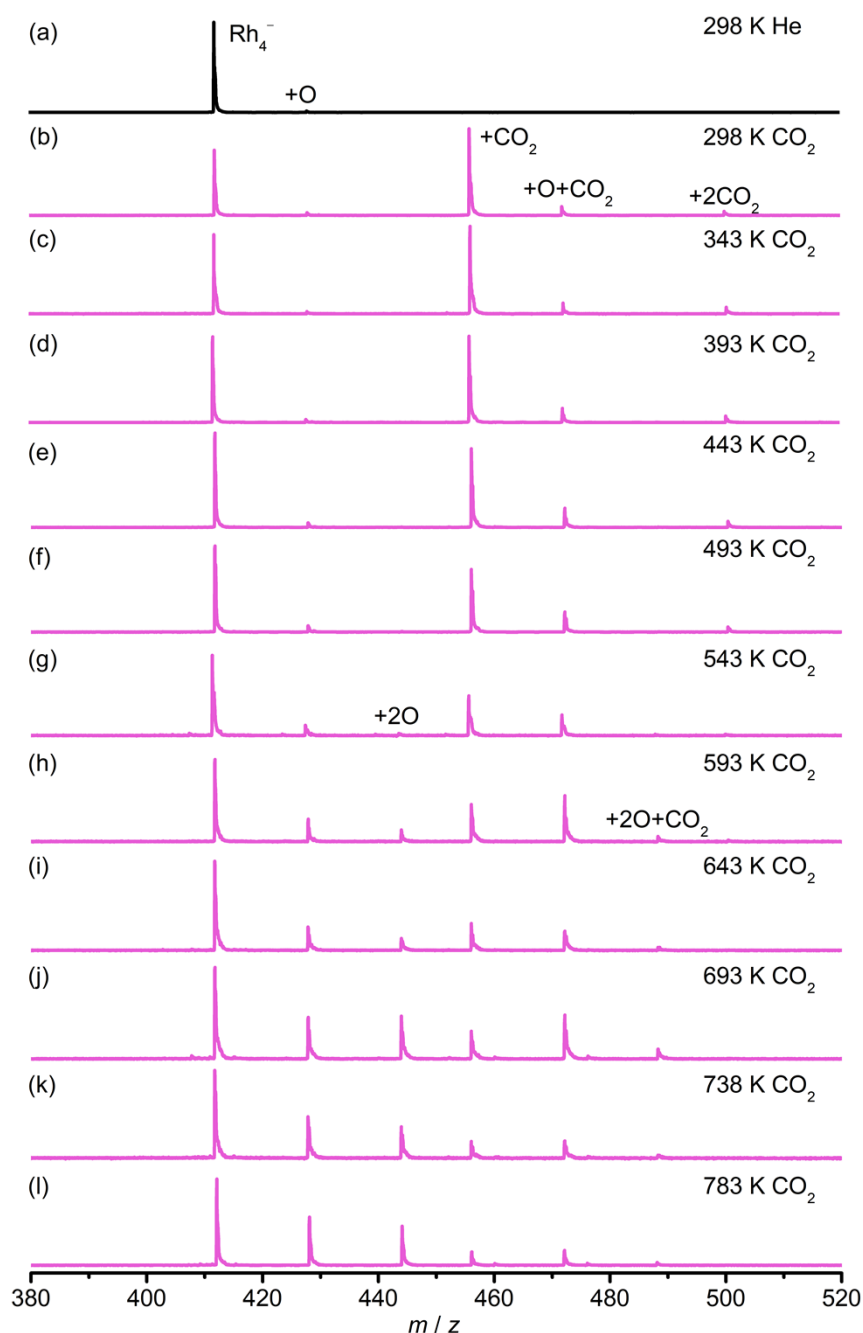

**Fig. S2** The TOF mass spectra for the reactions of mass-selected  $\text{Rh}_4^-$  clusters with He at 298 K (a) and  $\text{CO}_2$  at 298 K (b), 343 K (c), 393 K (d), 443 K (e), 493 K (f), 543 K (g), 593 K (h), 643 K (i), 693 K (j), 738 K (k), and 783 K (l). The maximum molecule density of  $\text{CO}_2$  is about  $1.8 \times 10^{12}$  (b),  $1.4 \times 10^{12}$  (c),  $1.9 \times 10^{12}$  (d),  $2.4 \times 10^{12}$  (e),  $3.5 \times 10^{12}$  (f),  $8.7 \times 10^{12}$  (g),  $16 \times 10^{12}$  (h),  $15 \times 10^{12}$  (i),  $23 \times 10^{12}$  (j),  $22 \times 10^{12}$  (k), and  $50 \times 10^{12}$  molecules  $\text{cm}^{-3}$  (l). The  $\text{Rh}_4\text{X}^-$  ( $X = \text{O}, \text{CO}_2$ , etc) species are labeled as  $+X$ .

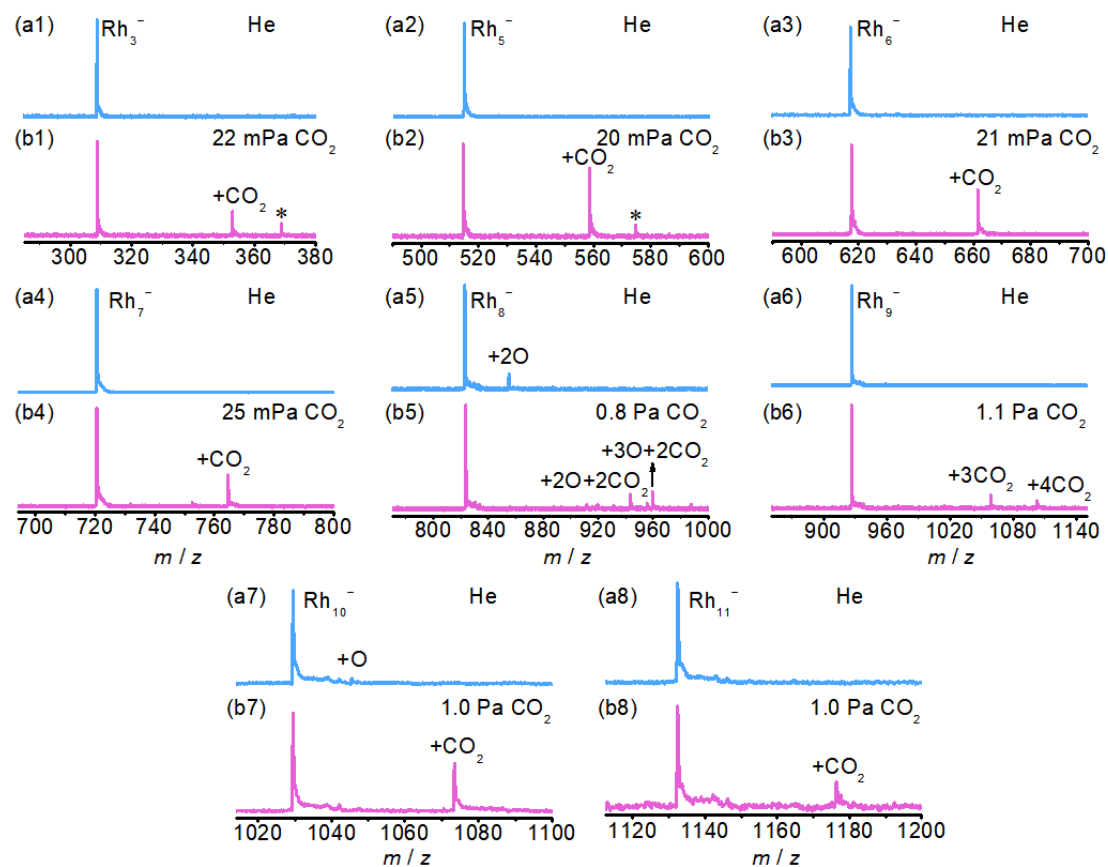

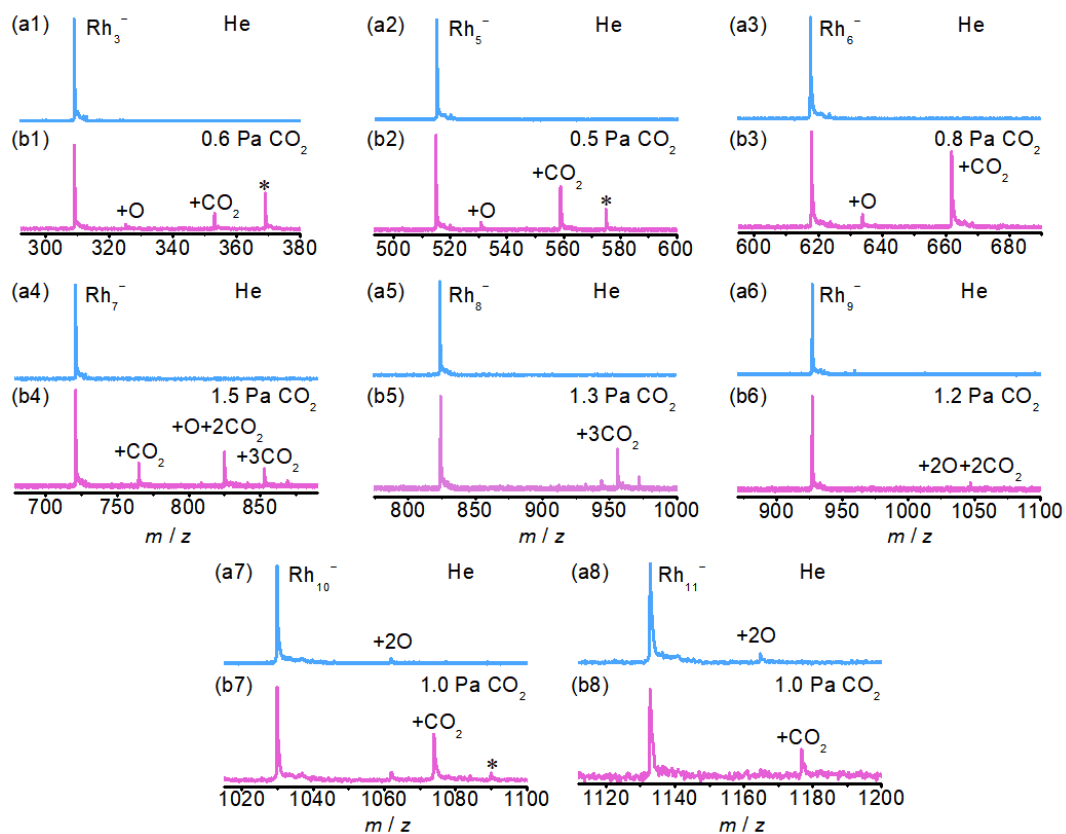

**Fig. S4** The TOF mass spectra for the reactions of mass-selected  $\text{Rh}_n^-$  ( $n = 3, 5-11$ ) clusters with He (a) and  $\text{CO}_2$  (b) at 593 K. The reactant pressures are given in Pa. The  $\text{Rh}_n\text{X}^-$  ( $\text{X} = \text{O}, \text{CO}_2$ , etc) species are labeled as +X. The signals marked with asterisks are  $\text{ORh}_n\text{CO}_2^-$  ( $n = 3, 5$ , and  $10$ ) ( $\text{Rh}_n\text{CO}_2^- + \text{CO}_2 \rightarrow \text{ORh}_n\text{CO}_2^- + \text{CO}$ ).

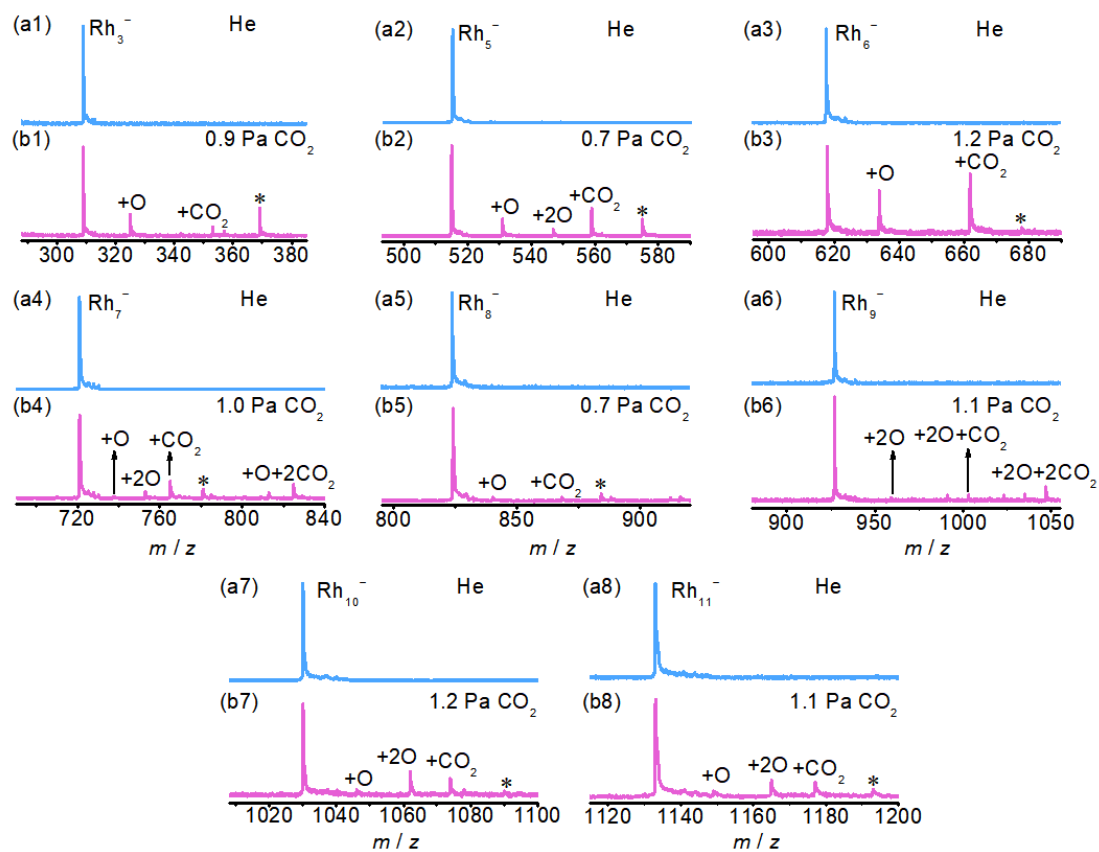

**Fig. S5** The TOF mass spectra for the reactions of mass-selected  $\text{Rh}_n^-$  ( $n = 3, 5-11$ ) clusters with He (a) and  $\text{CO}_2$  (b) at 693 K. The reactant pressures are given in Pa. The  $\text{Rh}_n\text{X}^-$  ( $\text{X} = \text{O}, \text{CO}_2$ , etc) species are labeled as +X. The signals marked with asterisks are  $\text{ORh}_n\text{CO}_2^-$  ( $n = 3, 5-8, 10-11$ ) ( $\text{Rh}_n\text{CO}_2^- + \text{CO}_2 \rightarrow \text{ORh}_n\text{CO}_2^- + \text{CO}$ ).

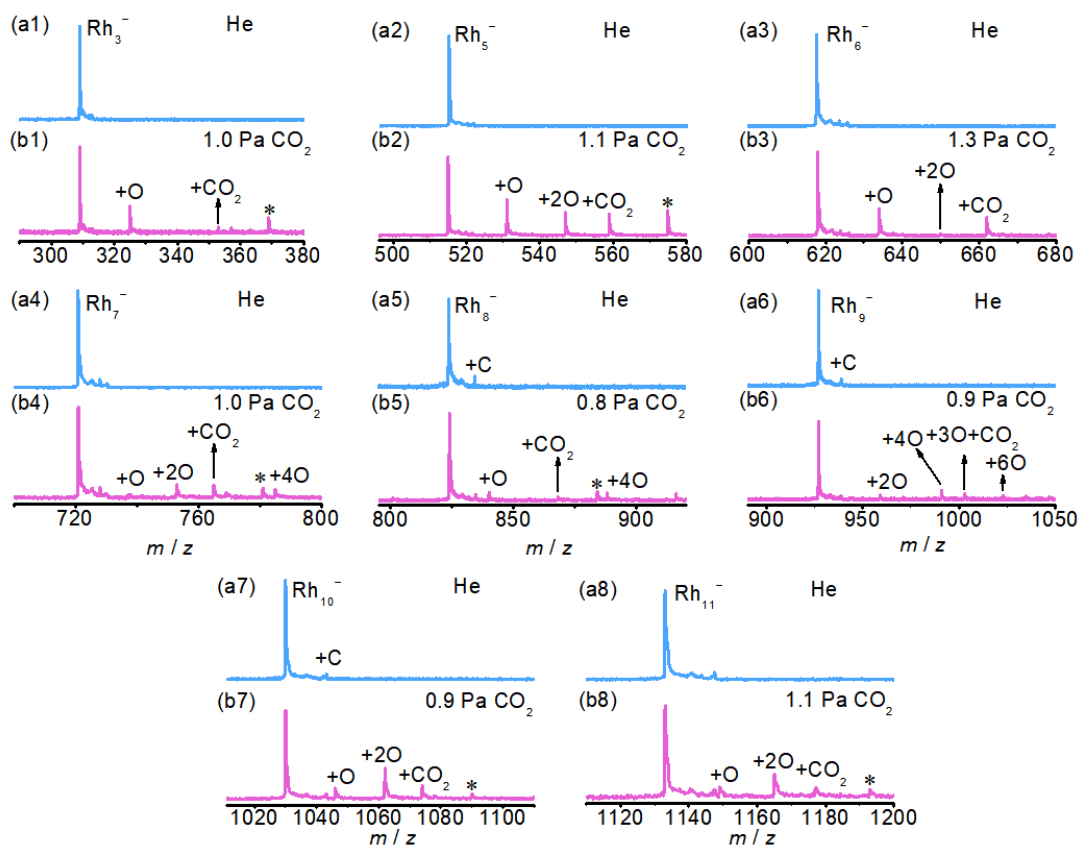

**Fig. S6** The TOF mass spectra for the reactions of mass-selected  $\text{Rh}_n^-$  ( $n = 3, 5-11$ ) clusters with He (a) and  $\text{CO}_2$  (b) at 738 K. The reactant pressures are given in Pa. The  $\text{Rh}_n\text{X}^-$  ( $\text{X} = \text{O}, \text{CO}_2$ , etc) species are labeled as +X. The signals marked with asterisks are  $\text{ORh}_n\text{CO}_2^-$  ( $n = 3, 5, 7-8, 10-11$ ) ( $\text{Rh}_n\text{CO}_2^- + \text{CO}_2 \rightarrow \text{ORh}_n\text{CO}_2^- + \text{CO}$ ).

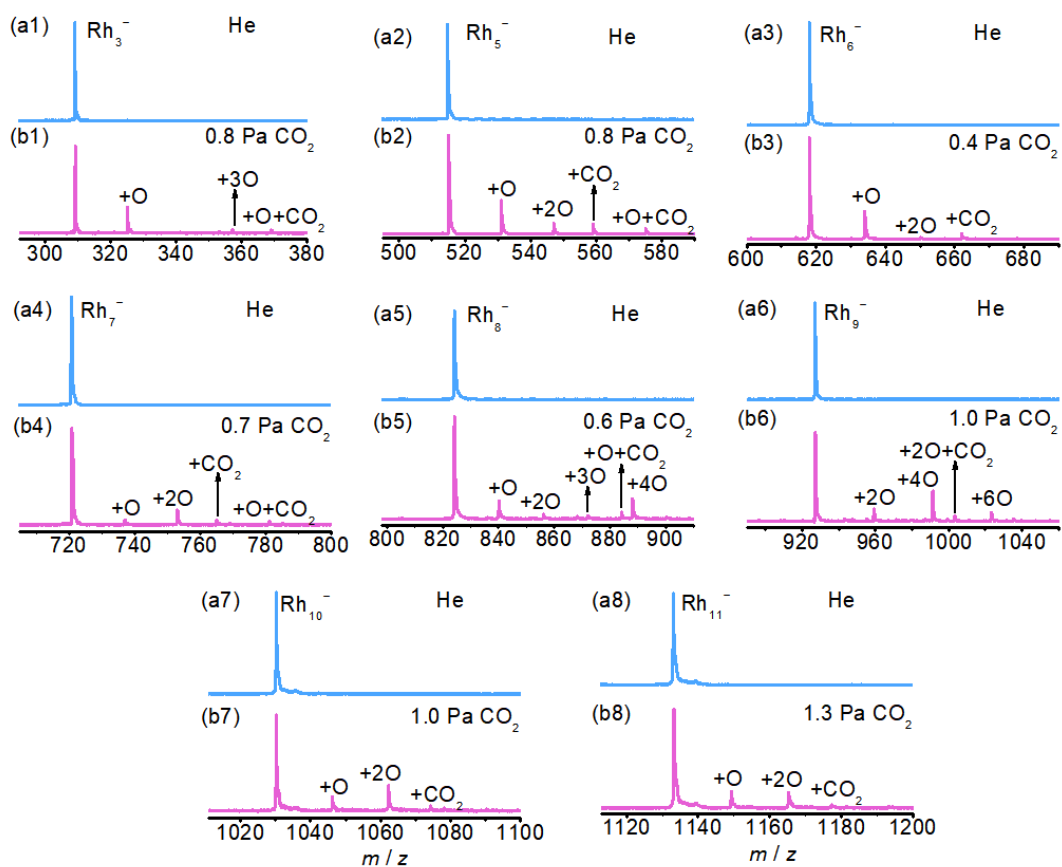

**Fig. S7** The TOF mass spectra for the reactions of mass-selected  $\text{Rh}_n^-$  ( $n = 3, 5-11$ ) clusters with He (a) and  $\text{CO}_2$  (b) at 783 K. The reactant pressures are given in Pa. The  $\text{Rh}_n\text{X}^-$  ( $\text{X} = \text{O}, \text{CO}_2$ , etc) species are labeled as +X.



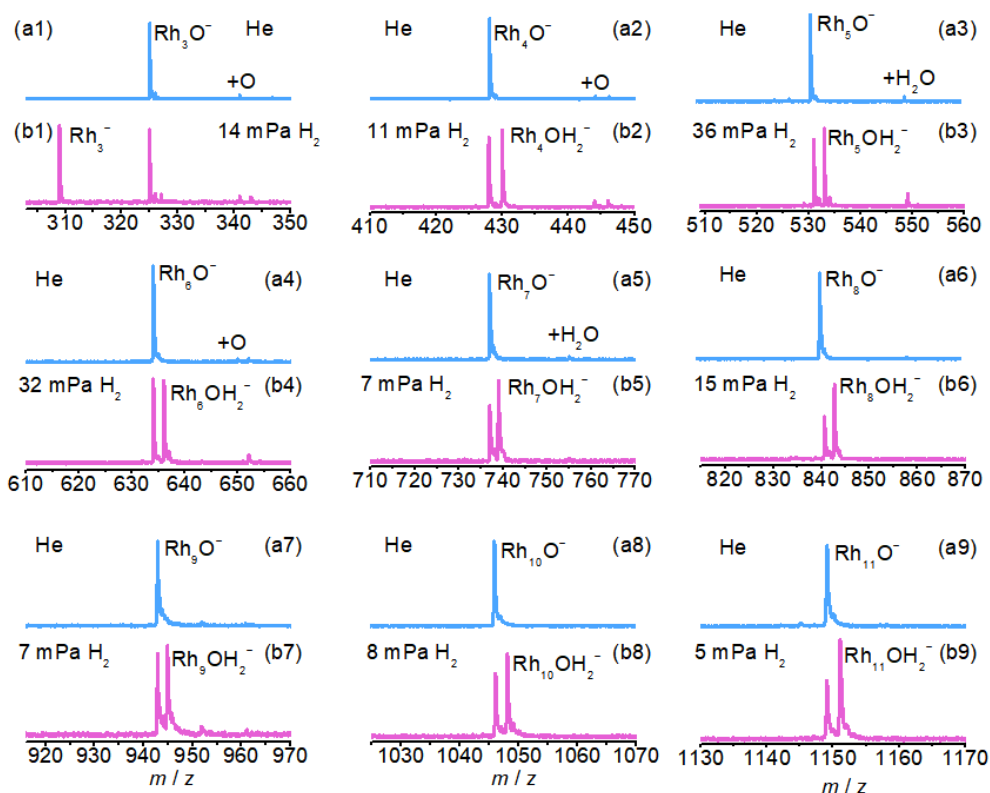

**Fig. S8** The TOF mass spectra for the reactions of mass-selected  $\text{Rh}_n\text{O}^-$  ( $n = 3-11$ ) clusters with He (a) and  $\text{H}_2$  (b) at 298 K. The reactant pressures are given in mPa ( $= 10^{-3}$  Pa). The  $\text{Rh}_n\text{OX}^-$  ( $X = \text{O}$  and  $\text{H}_2\text{O}$ ) species are labeled as +X.

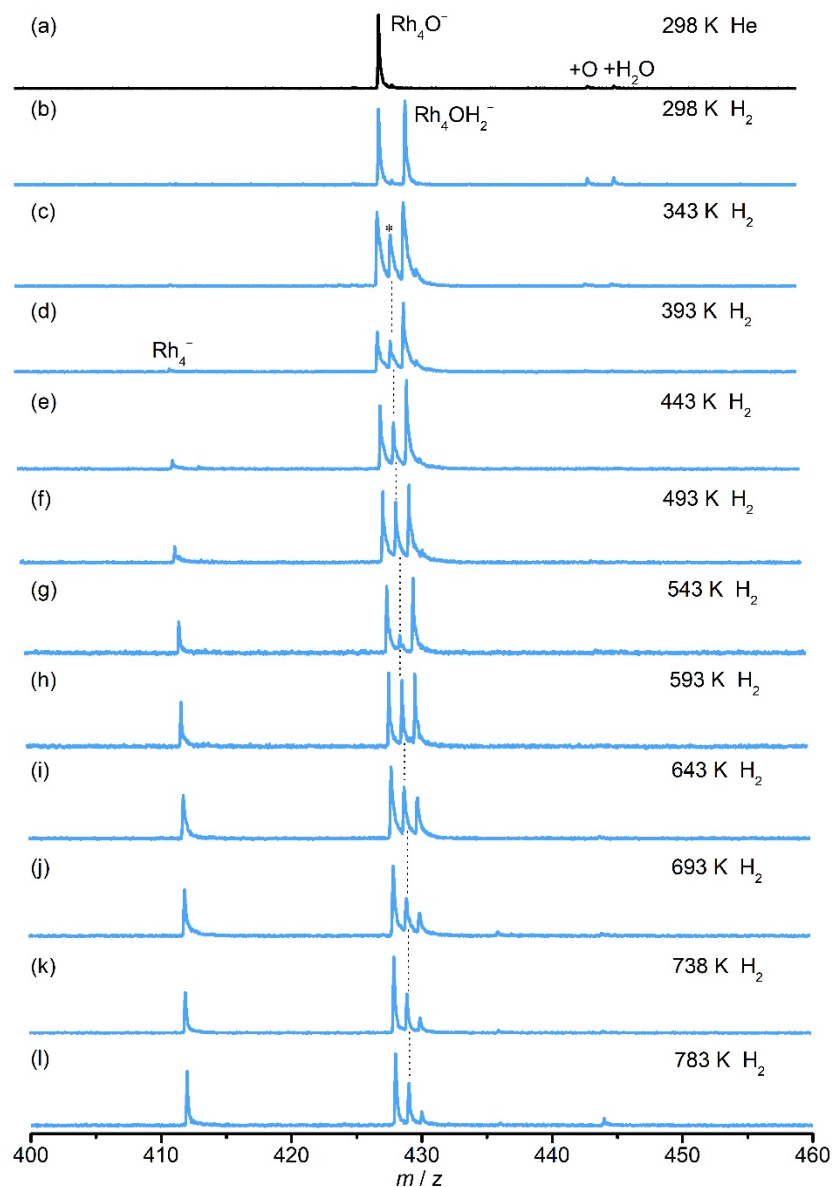

**Fig. S9** The TOF mass spectra for the reactions of mass-selected  $\text{Rh}_4\text{O}^-$  with He at 298 K (a),  $\text{H}_2$  at 298 K (b), 343 K (c), 393 K (d), 443 K (e), 493 K (f), 543 K (g), 593 K (h), 643 K (i), 693 K (j), 738 K (k), and 783 K (l). The maximum molecule density of  $\text{H}_2$  is about  $3.5 \times 10^{12}$  (b),  $3.8 \times 10^{12}$  (c),  $8.5 \times 10^{12}$  (d),  $10 \times 10^{12}$  (e),  $11 \times 10^{12}$  (f),  $18 \times 10^{12}$  (g),  $19 \times 10^{12}$  (h),  $17 \times 10^{12}$  (i),  $23 \times 10^{12}$  (j),  $19 \times 10^{12}$  (k), and  $30 \times 10^{12}$  molecules  $\text{cm}^{-3}$  (l). Peaks marked with asterisk is  $\text{Rh}_4\text{OH}^-$ . The  $\text{Rh}_4\text{OX}^-$  ( $X = \text{O}$  and  $\text{H}_2\text{O}$ ) species are labeled as +X.

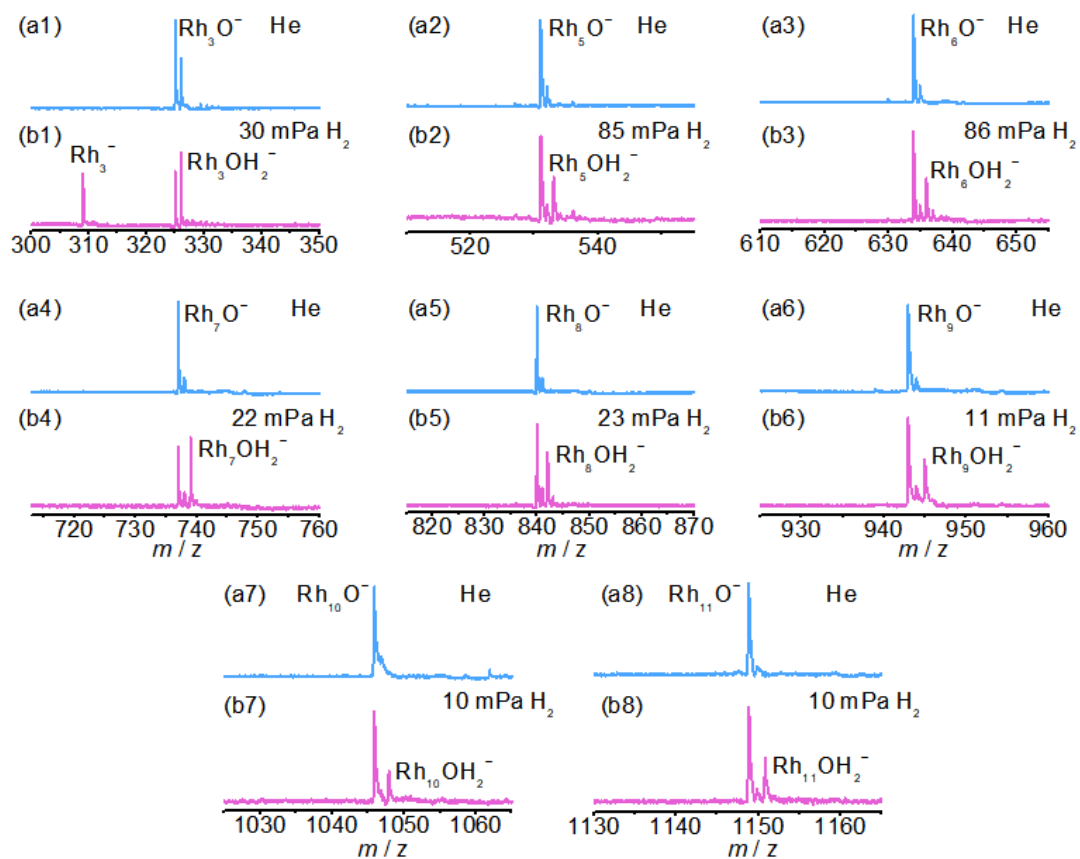

**Fig. S10** The TOF mass spectra for the reactions of mass-selected  $\text{Rh}_n\text{O}^-$  ( $n = 3, 5-11$ ) clusters with He (a) and  $\text{H}_2$  (b) at 443 K. The reactant pressures are given in mPa ( $= 10^{-3}$  Pa).

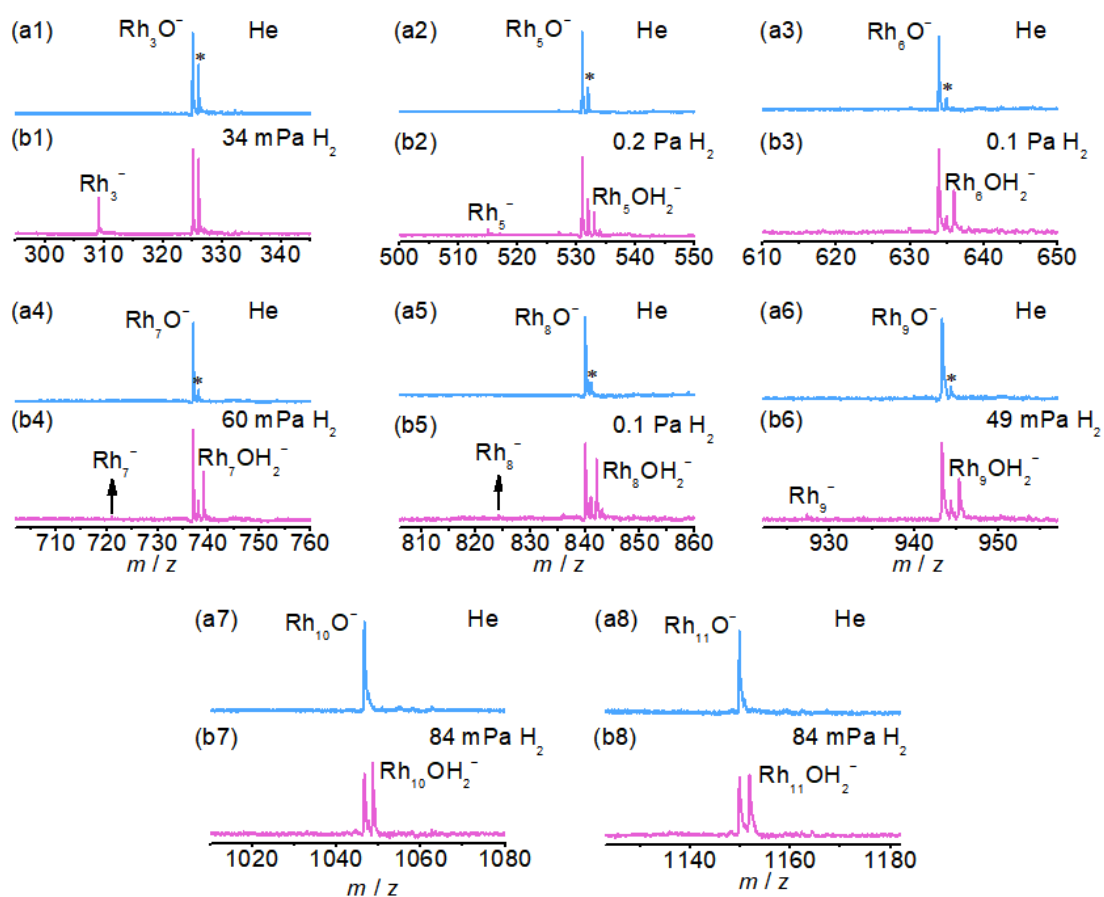

**Fig. S11** The TOF mass spectra for the reactions of mass-selected  $\text{Rh}_n\text{O}^-$  ( $n = 3, 5-11$ ) clusters with He (a) and  $\text{H}_2$  (b) at 543 K. The reactant pressures are given in mPa ( $= 10^{-3}$  Pa) or Pa. Peaks marked with asterisks are  $\text{Rh}_n\text{OH}^-$ .

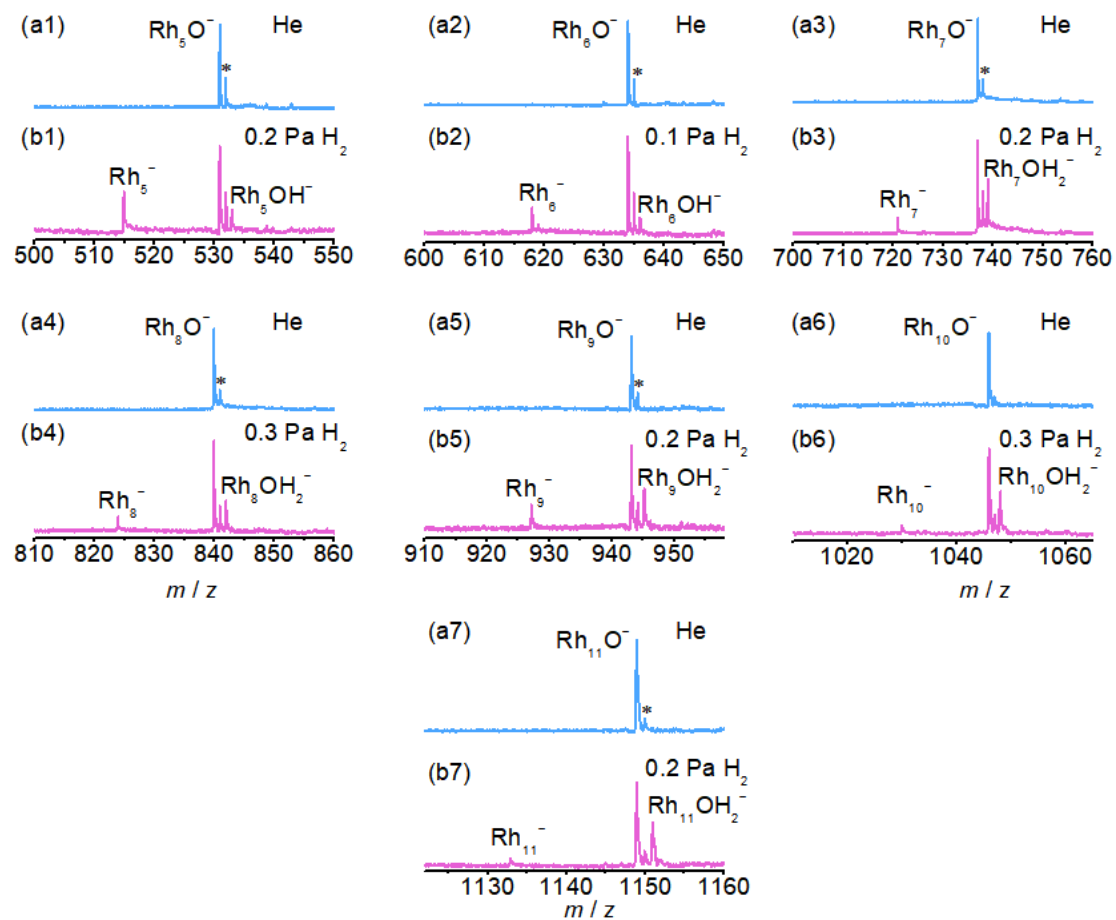

**Fig. S12** The TOF mass spectra for the reactions of mass-selected  $\text{Rh}_n\text{O}^-$  ( $n = 5-11$ ) clusters with He (a) and  $\text{H}_2$  (b) at 643 K. The reactant pressures are given in Pa. Peaks marked with asterisks are  $\text{Rh}_n\text{OH}^-$ .

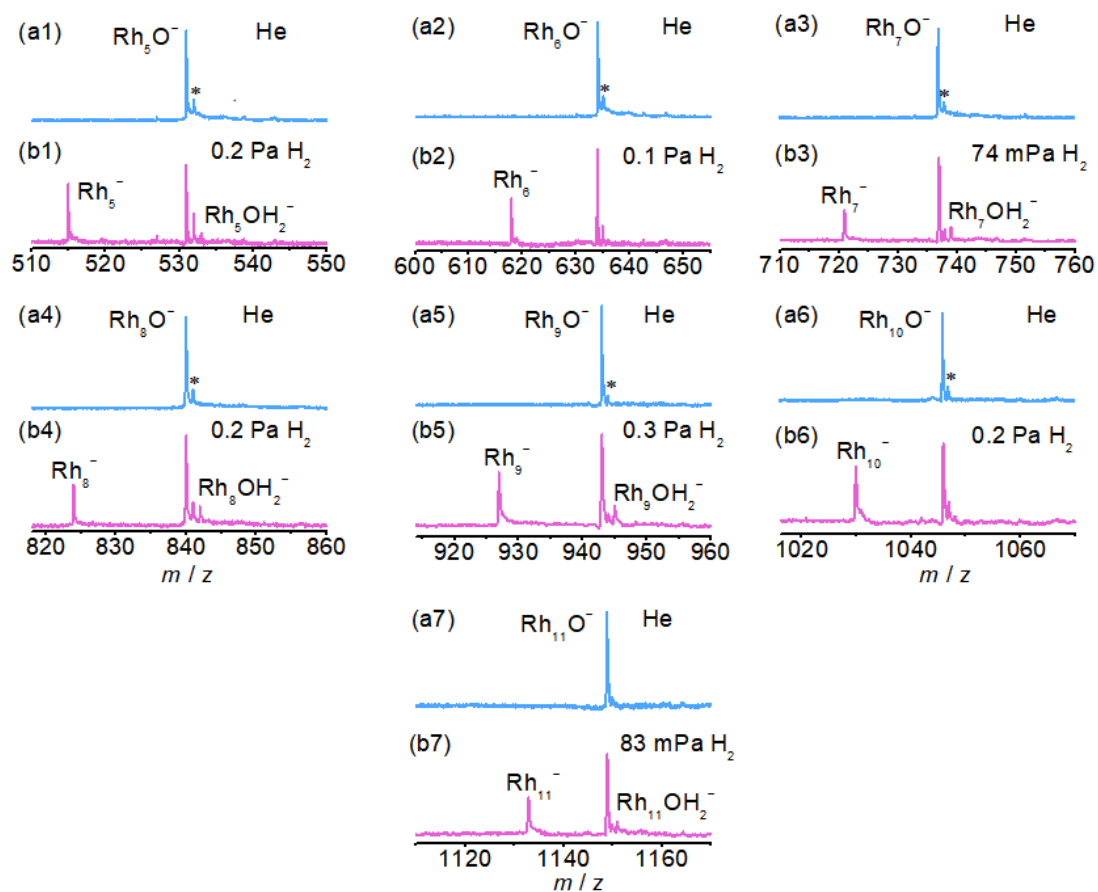

**Fig. S13** The TOF mass spectra for the reactions of mass-selected  $\text{Rh}_n\text{O}^-$  ( $n = 5-11$ ) clusters with He (a) and  $\text{H}_2$  (b) at 693 K. The reactant pressures are given in mPa ( $= 10^{-3}$  Pa) or Pa. Peaks marked with asterisks are  $\text{Rh}_n\text{OH}^-$ .

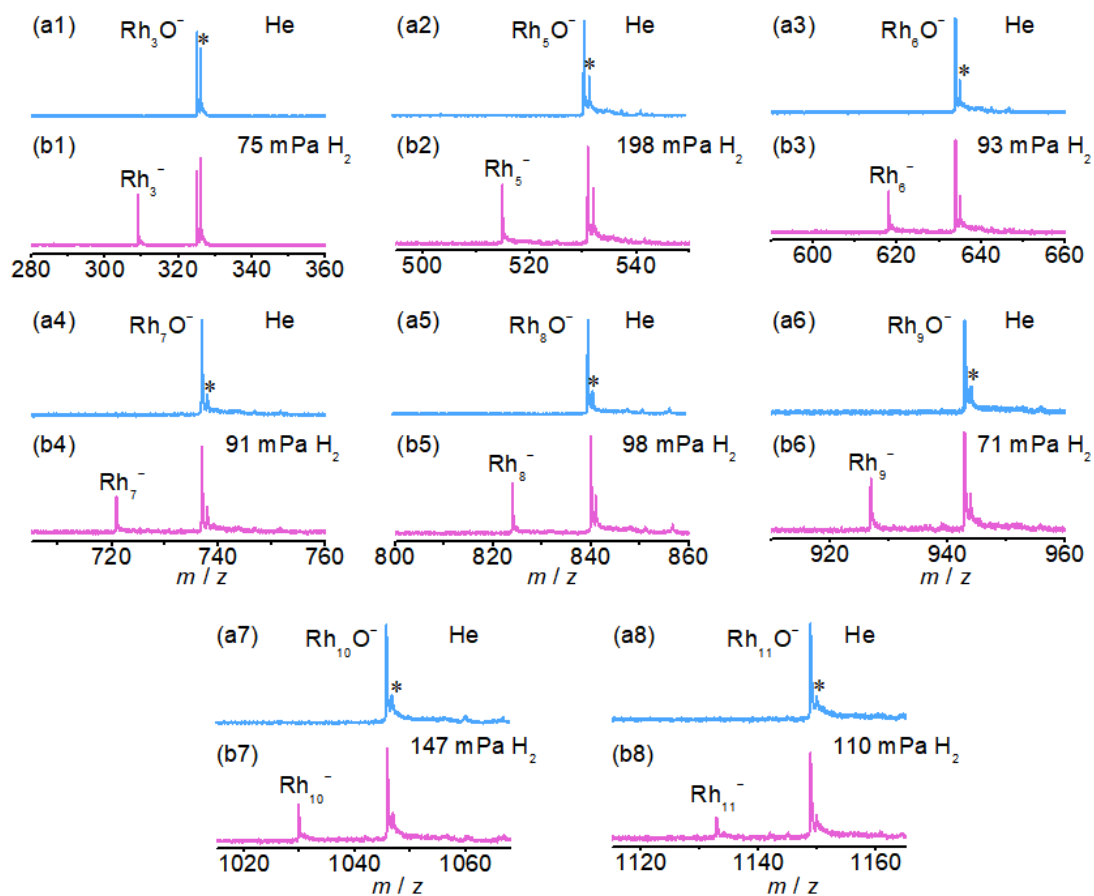

**Fig. S14** The TOF mass spectra for the reactions of mass-selected  $\text{Rh}_n\text{O}^-$  ( $n = 3, 5-11$ ) clusters with He (a) and  $\text{H}_2$  (b) at 783 K. The reactant pressures are given in mPa ( $= 10^{-3}$  Pa). Peaks marked with asterisks are  $\text{Rh}_n\text{OH}^-$ .

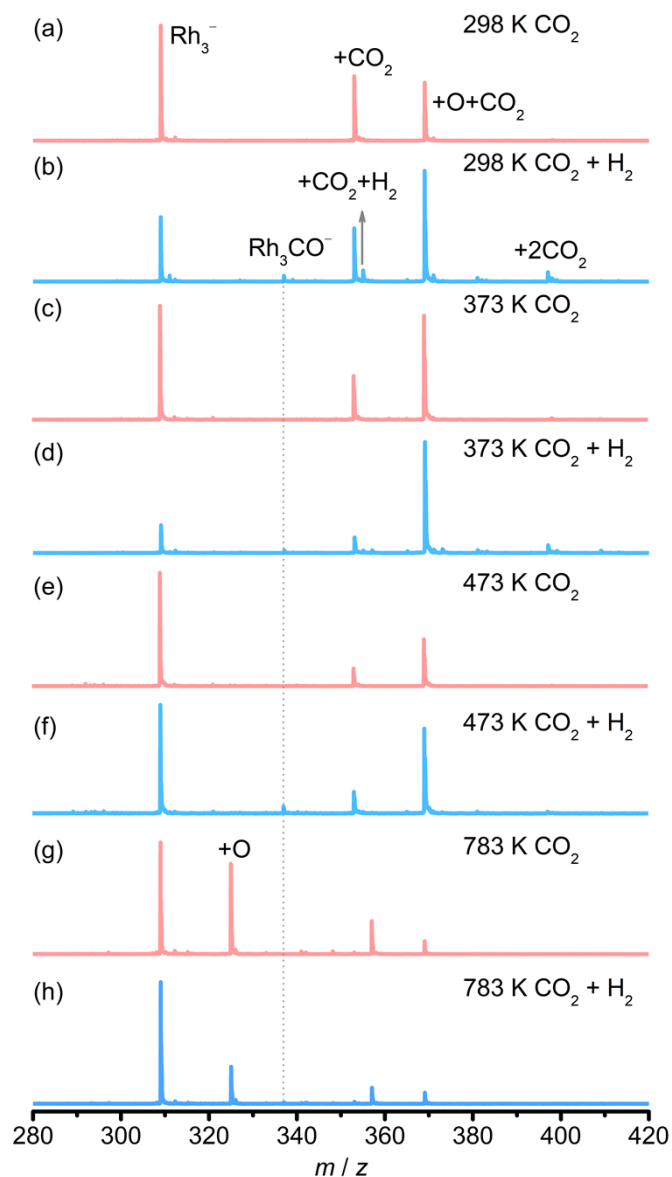

**Fig. S15** The TOF mass spectra for the reactions of mass-selected  $\text{Rh}_3^-$  clusters with  $\text{CO}_2$  at 298 K (a), 373 K (c), 473 K (e) and 783 K (g), with  $\text{CO}_2 + \text{H}_2$  at 298 K (b), 373 K (d), 473 K (f) and 783 K (h) in the single ion trap experiment in which  $\text{CO}_2$  and  $\text{H}_2$  are delivered into the same ion trap. The maximum molecule density of reactant gases is about  $3.0 \times 10^{12}$  (a),  $1.9 \times 10^{12}$  (c),  $3.1 \times 10^{12}$  (e),  $13 \times 10^{12}$  (g) for  $\text{CO}_2$  and  $104 \times 10^{12}$  (b),  $70 \times 10^{12}$  (d),  $78 \times 10^{12}$  (f),  $6.7 \times 10^{12}$  molecules  $\text{cm}^{-3}$  (h) for  $\text{H}_2$ . The  $\text{Rh}_3\text{X}^-$  ( $\text{X} = \text{O}, \text{CO}_2$ , etc) species are labeled as  $+\text{X}$ .



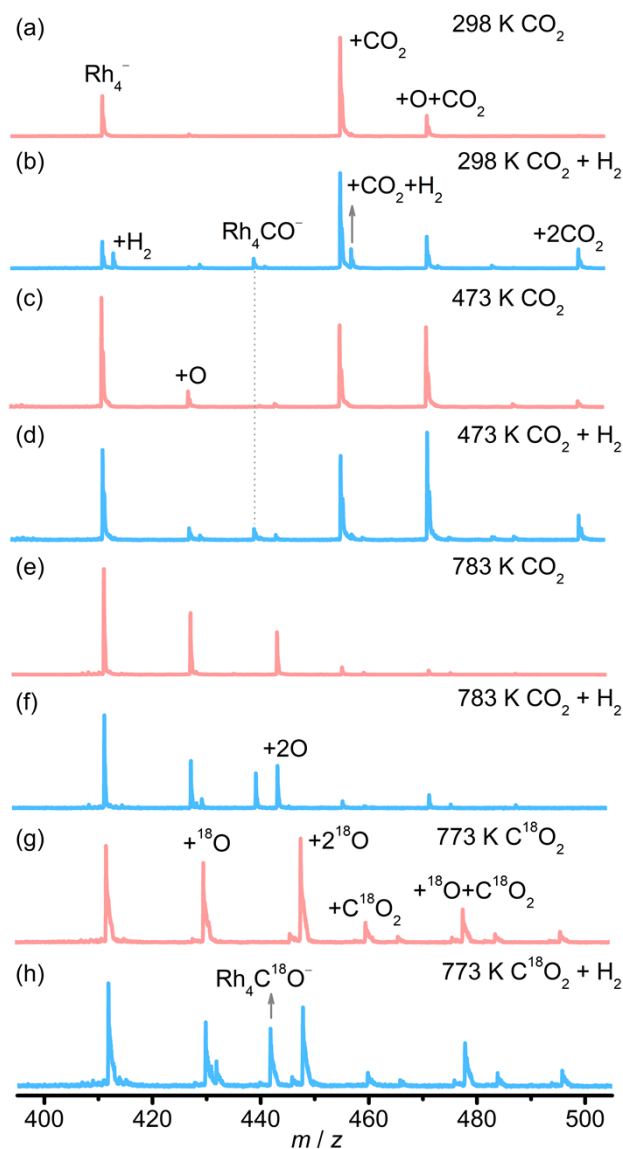

**Fig. S16** The TOF mass spectra for the reactions of mass-selected  $\text{Rh}_4^-$  clusters with  $\text{CO}_2$  at 298 K (a), 473 K (c), 783 K (e) and with  $\text{C}^{18}\text{O}_2$  at 773 K (g), with  $\text{CO}_2 + \text{H}_2$  at 298 K (b), 473 K (d), 783 K (f), and with  $\text{C}^{18}\text{O}_2 + \text{H}_2$  at 773 K (h) in the single ion trap experiment in which  $\text{CO}_2$  and  $\text{H}_2$  are delivered into the same ion trap. The maximum molecule density of reactant gases is about  $1.4 \times 10^{12}$  (a),  $1.5 \times 10^{12}$  (c),  $1.7 \times 10^{12}$  (e) for  $\text{CO}_2$ ,  $19 \times 10^{12}$  (g) for  $\text{C}^{18}\text{O}_2$ , and  $45 \times 10^{12}$  (b),  $14 \times 10^{12}$  (d),  $17 \times 10^{12}$  (f),  $36 \times 10^{12}$  molecules  $\text{cm}^{-3}$  (h) for  $\text{H}_2$ . The  $\text{Rh}_4\text{X}^-$  ( $\text{X} = \text{O}, \text{CO}_2$ , etc) species are labeled as  $+\text{X}$ .

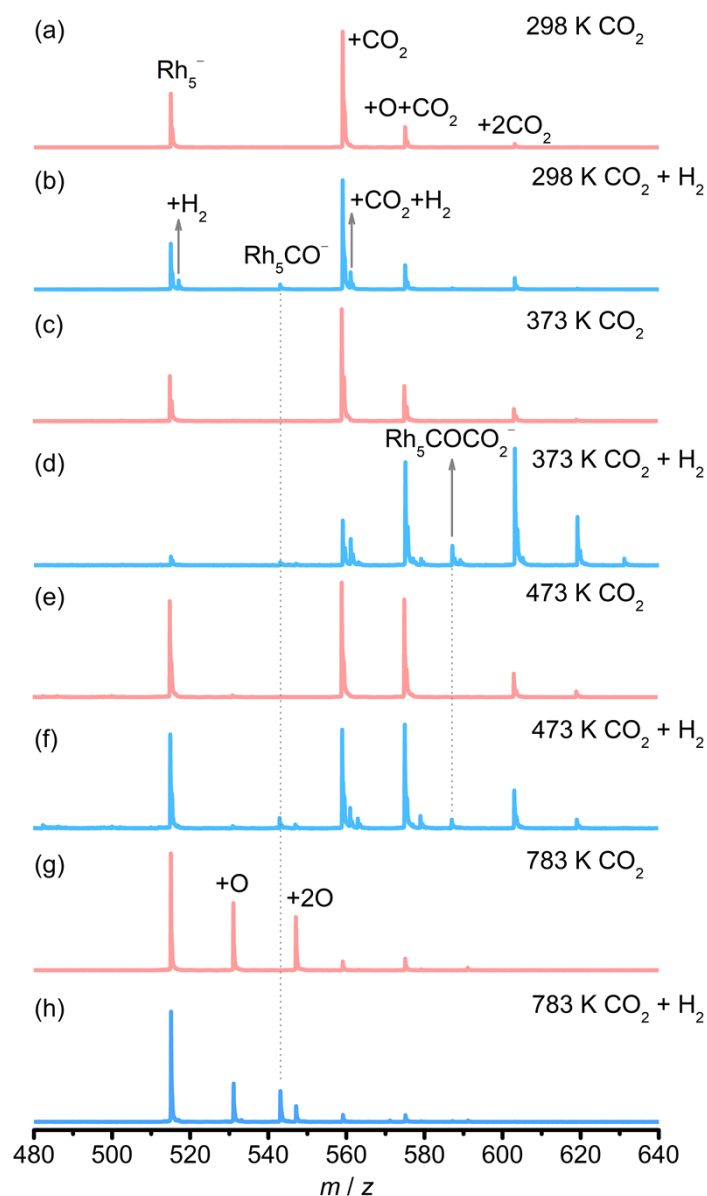

**Fig. S17** The TOF mass spectra for the reactions of mass-selected  $\text{Rh}_5^-$  clusters with  $\text{CO}_2$  at 298 K (a), 373 K (c), 473 K (e) and 783 K (g), with  $\text{CO}_2 + \text{H}_2$  at 298 K (b), 373 K (d), 473 K (f) and 783 K (h) in the single ion trap experiment in which  $\text{CO}_2$  and  $\text{H}_2$  are delivered into the same ion trap. The maximum molecule density of reactant gases is about  $2.0 \times 10^{12}$  (a),  $2.4 \times 10^{12}$  (c),  $2.4 \times 10^{12}$  (e),  $12 \times 10^{12}$  (g) for  $\text{CO}_2$  and  $21 \times 10^{12}$  (b),  $9.5 \times 10^{12}$  (d),  $12 \times 10^{12}$  (f),  $55 \times 10^{12}$  molecules  $\text{cm}^{-3}$  (h) for  $\text{H}_2$ . The  $\text{Rh}_5\text{X}^-$  ( $\text{X} = \text{O}, \text{CO}_2$ , etc) species are labeled as  $+\text{X}$ .

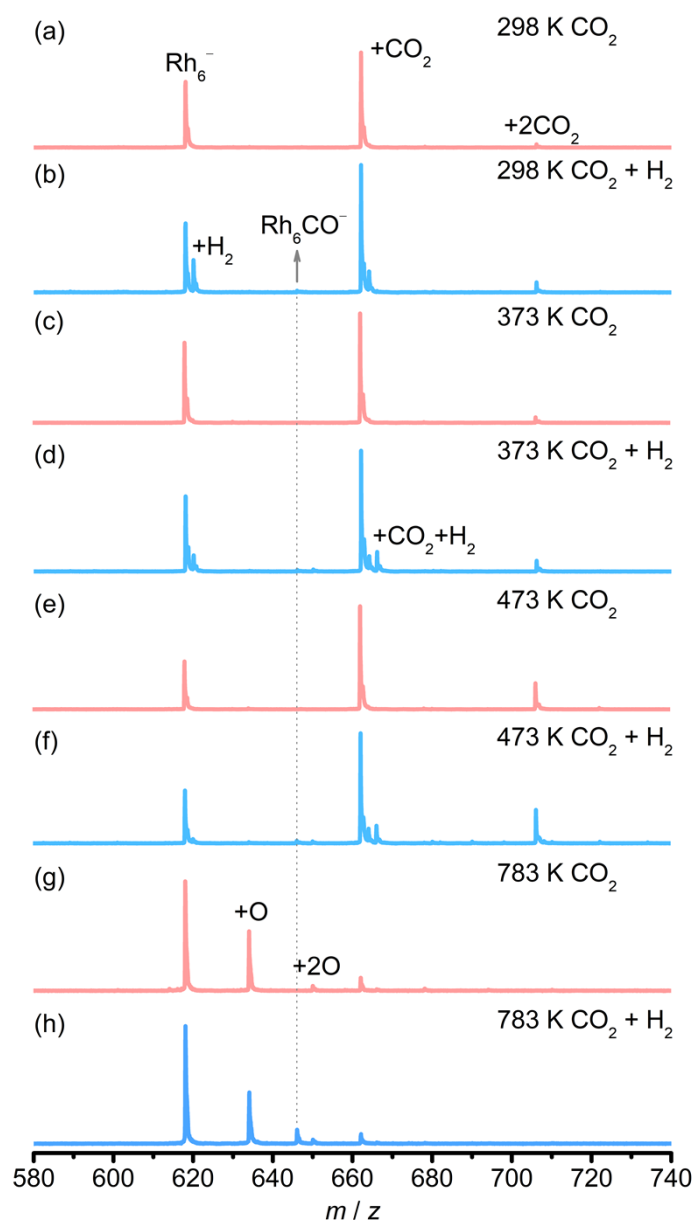

**Fig. S18** The TOF mass spectra for the reactions of mass-selected  $\text{Rh}_6^-$  clusters with  $\text{CO}_2$  at 298 K (a), 373 K (c), 473 K (e) and 783 K (g), with  $\text{CO}_2 + \text{H}_2$  at 298 K (b), 373 K (d), 473 K (f) and 783 K (h) in the single ion trap experiment in which  $\text{CO}_2$  and  $\text{H}_2$  are delivered into the same ion trap. The maximum molecule density of reactant gases is about  $2.0 \times 10^{12}$  (a),  $2.3 \times 10^{12}$  (c),  $3.3 \times 10^{12}$  (e),  $35 \times 10^{12}$  (g) for  $\text{CO}_2$  and  $28 \times 10^{12}$  (b),  $27 \times 10^{12}$  (d),  $12 \times 10^{12}$  (f),  $77 \times 10^{12}$  molecules  $\text{cm}^{-3}$  (h) for  $\text{H}_2$ . The  $\text{Rh}_6\text{X}^-$  ( $\text{X} = \text{O}, \text{CO}_2$ , etc) species are labeled as  $+\text{X}$ .

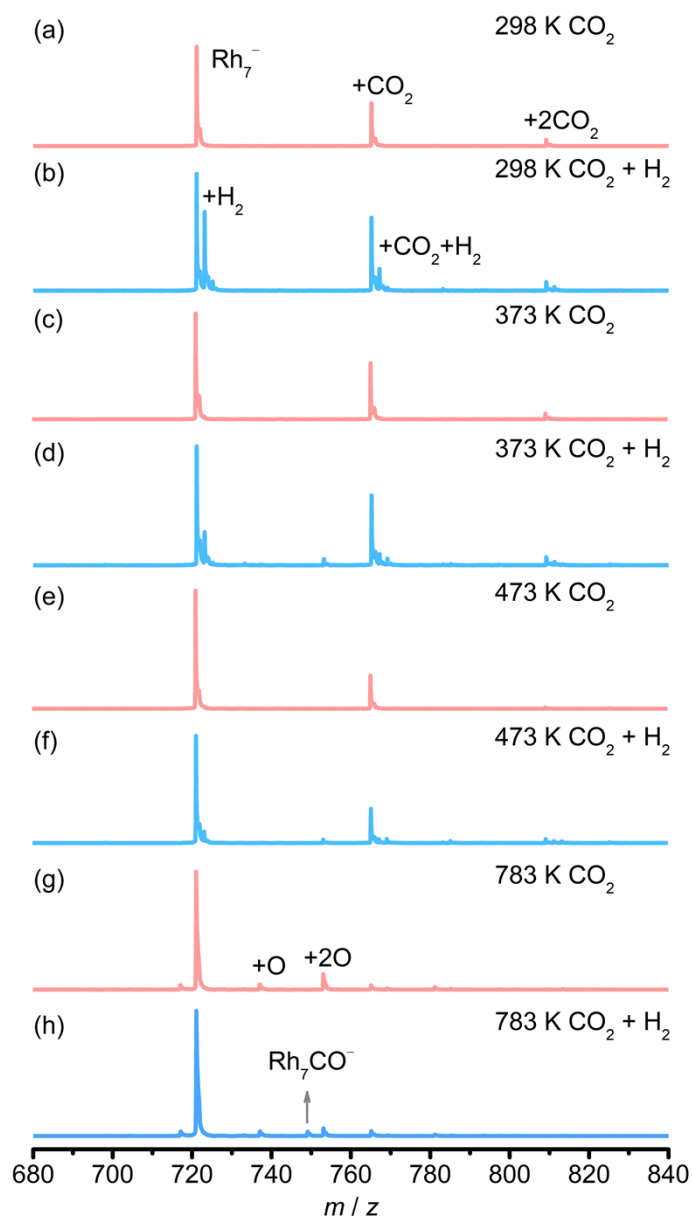

**Fig. S19** The TOF mass spectra for the reactions of mass-selected  $\text{Rh}_7^-$  clusters with  $\text{CO}_2$  at 298 K (a), 373 K (c), 473 K (e) and 783 K (g), with  $\text{CO}_2 + \text{H}_2$  at 298 K (b), 373 K (d), 473 K (f) and 783 K (h) in the single ion trap experiment in which  $\text{CO}_2$  and  $\text{H}_2$  are delivered into the same ion trap. The maximum molecule density of reactant gases is about  $3.7 \times 10^{12}$  (a),  $5.3 \times 10^{12}$  (c),  $5.5 \times 10^{12}$  (e),  $49 \times 10^{12}$  (g) for  $\text{CO}_2$  and  $14 \times 10^{12}$  (b),  $127 \times 10^{12}$  (d),  $9.4 \times 10^{12}$  (f),  $66 \times 10^{12}$  molecules  $\text{cm}^{-3}$  (h) for  $\text{H}_2$ . The  $\text{Rh}_7\text{X}^-$  ( $\text{X} = \text{O}, \text{CO}_2$ , etc) species are labeled as  $+\text{X}$ .

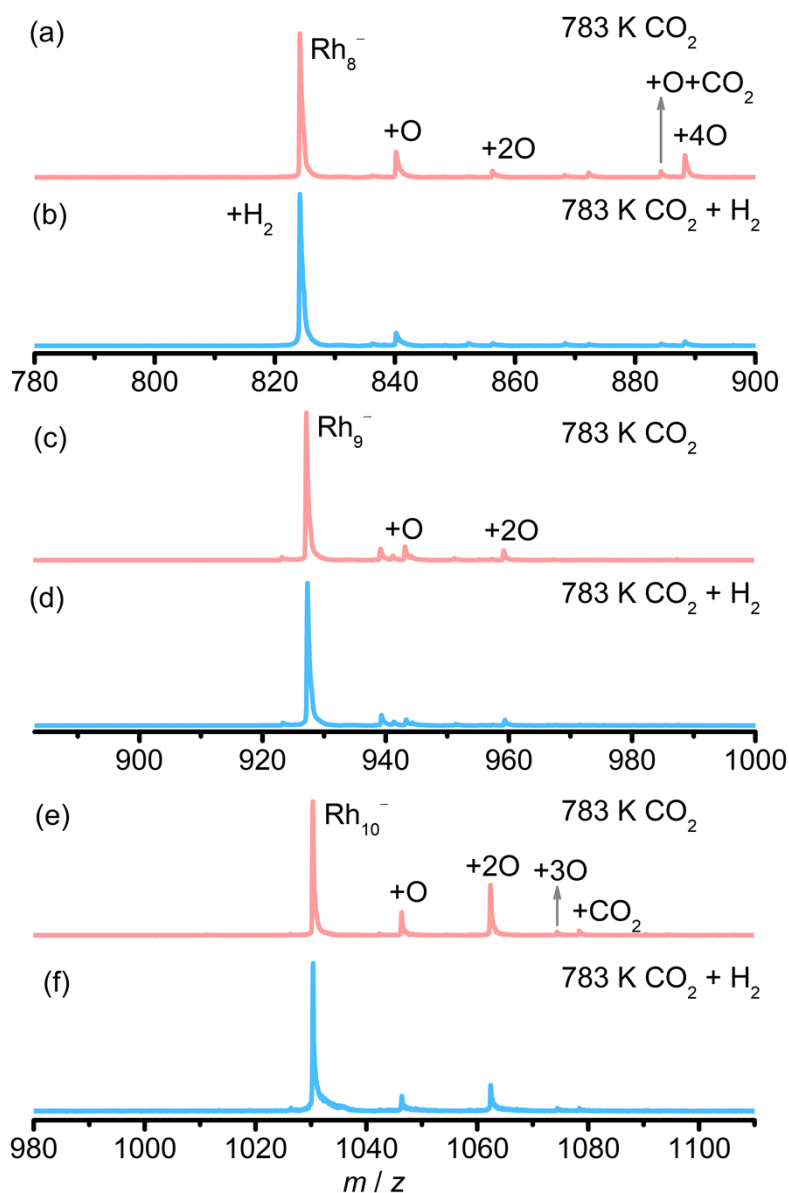

**Fig. S20** The TOF mass spectra for the reactions of mass-selected  $\text{Rh}_8^-$  clusters with  $\text{CO}_2$  at 783 K (a), with  $\text{CO}_2 + \text{H}_2$  at 783 K (b),  $\text{Rh}_9^-$  clusters with  $\text{CO}_2$  at 783 K (c), with  $\text{CO}_2 + \text{H}_2$  at 783 K (d), and  $\text{Rh}_{10}^-$  clusters with  $\text{CO}_2$  at 783 K (e), with  $\text{CO}_2 + \text{H}_2$  at 783 K (f) in the single ion trap experiment in which  $\text{CO}_2$  and  $\text{H}_2$  are delivered into the same ion trap. The maximum molecule density of reactant gases is about  $50 \times 10^{12}$  (a),  $9.7 \times 10^{12}$  (c),  $49 \times 10^{12}$  (e) for  $\text{CO}_2$  and  $71 \times 10^{12}$  (b),  $49 \times 10^{12}$  (d),  $82 \times 10^{12}$  molecules  $\text{cm}^{-3}$  (f) for  $\text{H}_2$ . The  $\text{Rh}_n\text{X}^-$  ( $\text{X} = \text{O}, \text{CO}_2$ , etc) species are labeled as +X.

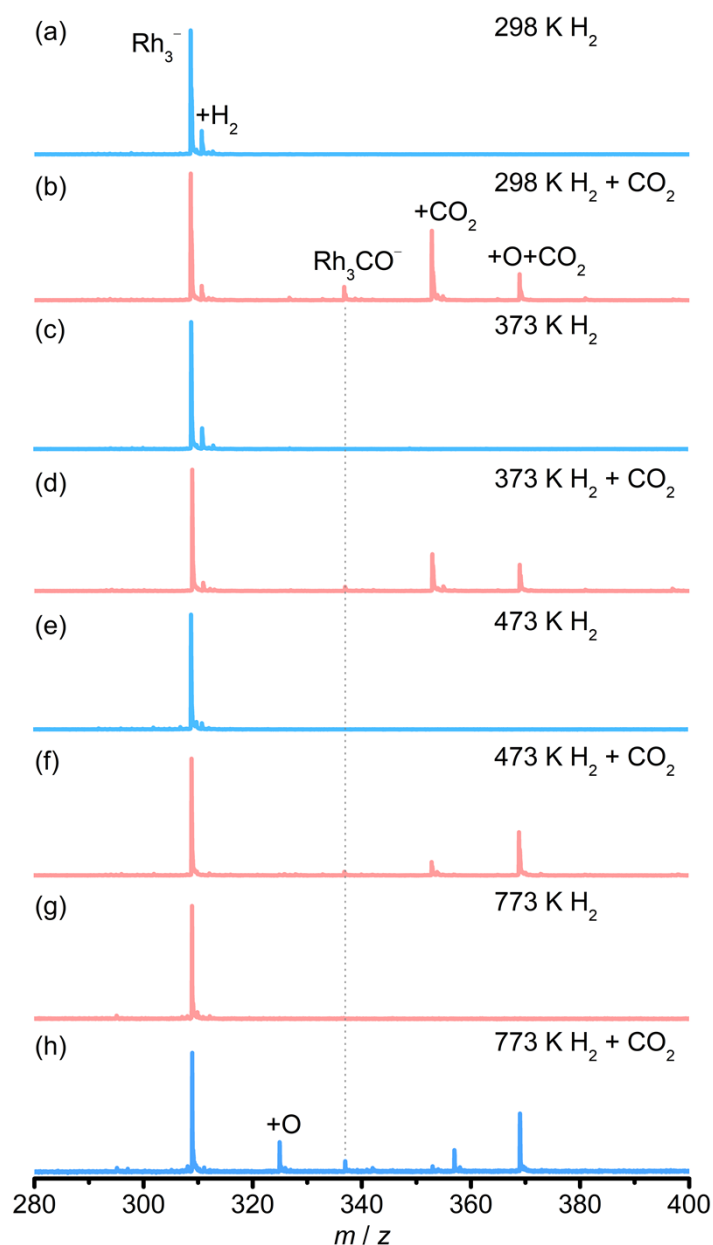

**Fig. S21** The TOF mass spectra for the reactions of mass-selected  $\text{Rh}_3^-$  clusters with  $\text{H}_2$  at 298 K (a), 373 K (c), 473 K (e) and 773 K (g), with  $\text{H}_2 + \text{CO}_2$  at 298 K (b), 373 K (d), 473 K (f) and 773 K (h) in the single ion trap experiment in which  $\text{H}_2$  and  $\text{CO}_2$  are delivered into the same ion trap. The maximum molecule density of reactant gases is about  $16 \times 10^{12}$  (a),  $74 \times 10^{12}$  (c),  $65 \times 10^{12}$  (e),  $26 \times 10^{12}$  (g) for  $\text{H}_2$  and  $2.5 \times 10^{12}$  (b),  $0.7 \times 10^{12}$  (d),  $0.9 \times 10^{12}$  (f),  $29 \times 10^{12}$  molecules  $\text{cm}^{-3}$  (h) for  $\text{CO}_2$ . The  $\text{Rh}_3\text{X}^-$  ( $\text{X} = \text{H}_2, \text{CO}_2$ , etc) species are labeled as  $+\text{X}$ .

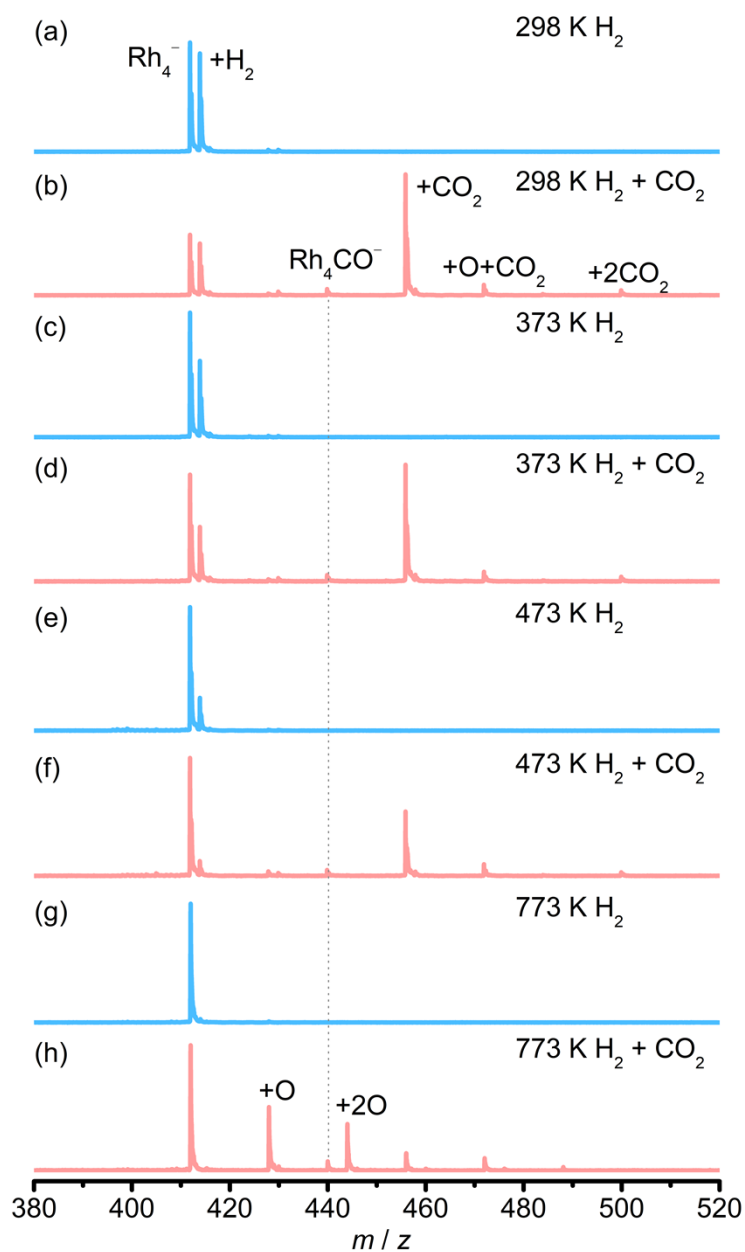

**Fig. S22** The TOF mass spectra for the reactions of mass-selected  $\text{Rh}_4^-$  clusters with  $\text{H}_2$  at 298 K (a), 373 K (c), 473 K (e) and 773 K (g), with  $\text{H}_2 + \text{CO}_2$  at 298 K (b), 373 K (d), 473 K (f) and 773 K (h) in the single ion trap experiment in which  $\text{H}_2$  and  $\text{CO}_2$  are delivered into the same ion trap. The maximum molecule density of reactant gases is about  $28 \times 10^{12}$  (a),  $33 \times 10^{12}$  (c),  $39 \times 10^{12}$  (e),  $10 \times 10^{12}$  (g) for  $\text{H}_2$  and  $1.2 \times 10^{12}$  (b),  $1.1 \times 10^{12}$  (d),  $0.7 \times 10^{12}$  (f),  $20 \times 10^{12}$  molecules  $\text{cm}^{-3}$  (h) for  $\text{CO}_2$ . The  $\text{Rh}_4\text{X}^-$  ( $\text{X} = \text{H}_2, \text{CO}_2$ , etc) species are labeled as +X.

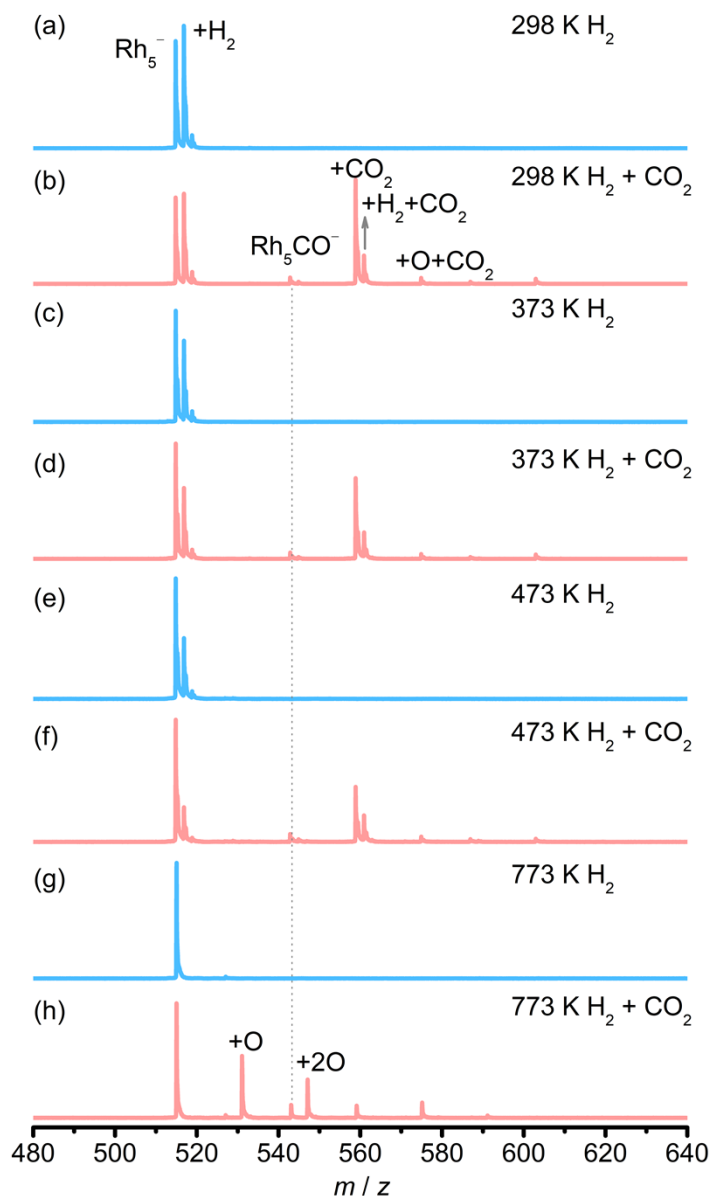

**Fig. S23** The TOF mass spectra for the reactions of mass-selected  $\text{Rh}_5^-$  clusters with  $\text{H}_2$  at 298 K (a), 373 K (c), 473 K (e) and 773 K (g), with  $\text{H}_2 + \text{CO}_2$  at 298 K (b), 373 K (d), 473 K (f) and 773 K (h) in the single ion trap experiment in which  $\text{H}_2$  and  $\text{CO}_2$  are delivered into the same ion trap. The maximum molecule density of reactant gases is about  $24 \times 10^{12}$  (a),  $33 \times 10^{12}$  (c),  $68 \times 10^{12}$  (e),  $19 \times 10^{12}$  (g) for  $\text{H}_2$  and  $0.2 \times 10^{12}$  (b),  $0.4 \times 10^{12}$  (d),  $0.7 \times 10^{12}$  (f),  $19 \times 10^{12}$  molecules  $\text{cm}^{-3}$  (h) for  $\text{CO}_2$ . The  $\text{Rh}_5\text{X}^-$  ( $\text{X} = \text{H}_2, \text{CO}_2, \text{etc}$ ) species are labeled as  $+\text{X}$ .



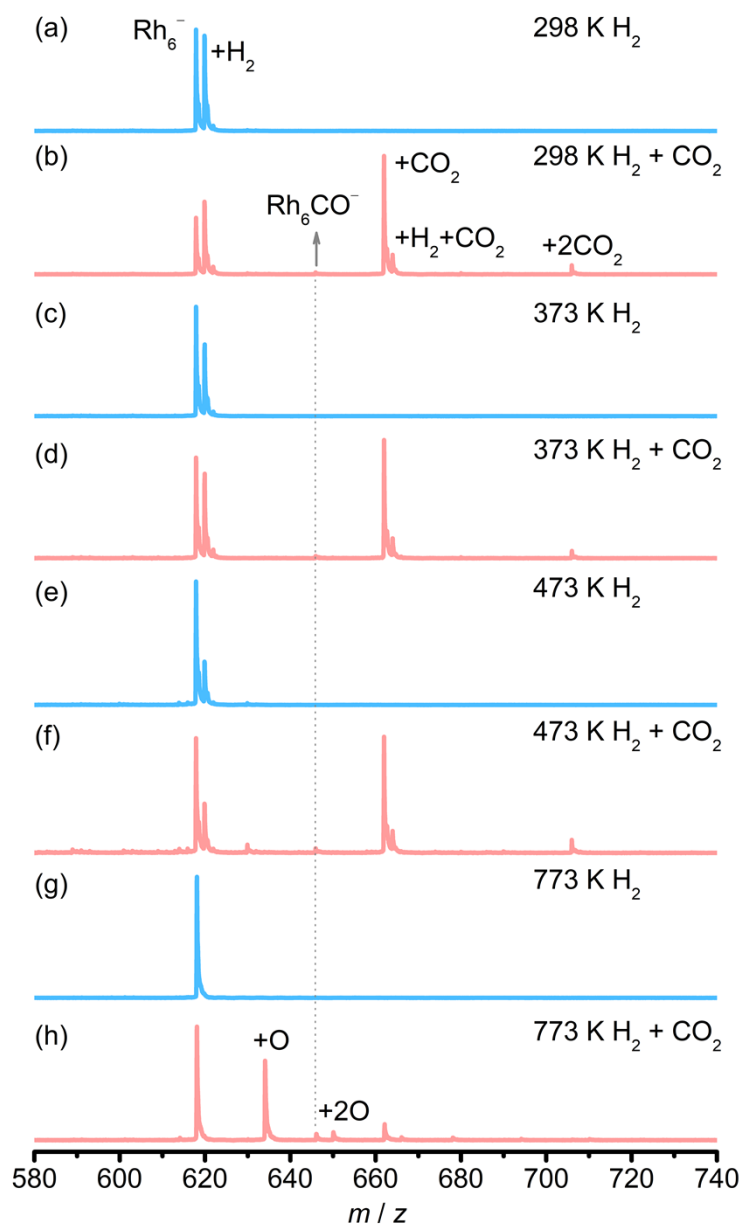

**Fig. S24** The TOF mass spectra for the reactions of mass-selected  $\text{Rh}_6^-$  clusters with  $\text{H}_2$  at 298 K (a), 373 K (c), 473 K (e) and 773 K (g), with  $\text{H}_2 + \text{CO}_2$  at 298 K (b), 373 K (d), 473 K (f) and 773 K (h) in the single ion trap experiment in which  $\text{H}_2$  and  $\text{CO}_2$  are delivered into the same ion trap. The maximum molecule density of reactant gases is about  $16 \times 10^{12}$  (a),  $24 \times 10^{12}$  (c),  $44 \times 10^{12}$  (e),  $20 \times 10^{12}$  (g) for  $\text{H}_2$  and  $0.8 \times 10^{12}$  (b),  $0.9 \times 10^{12}$  (d),  $2.2 \times 10^{12}$  (f),  $33 \times 10^{12}$  molecules  $\text{cm}^{-3}$  (h) for  $\text{CO}_2$ . The  $\text{Rh}_6\text{X}^-$  ( $\text{X} = \text{H}_2, \text{CO}_2$ , etc) species are labeled as  $+\text{X}$ .

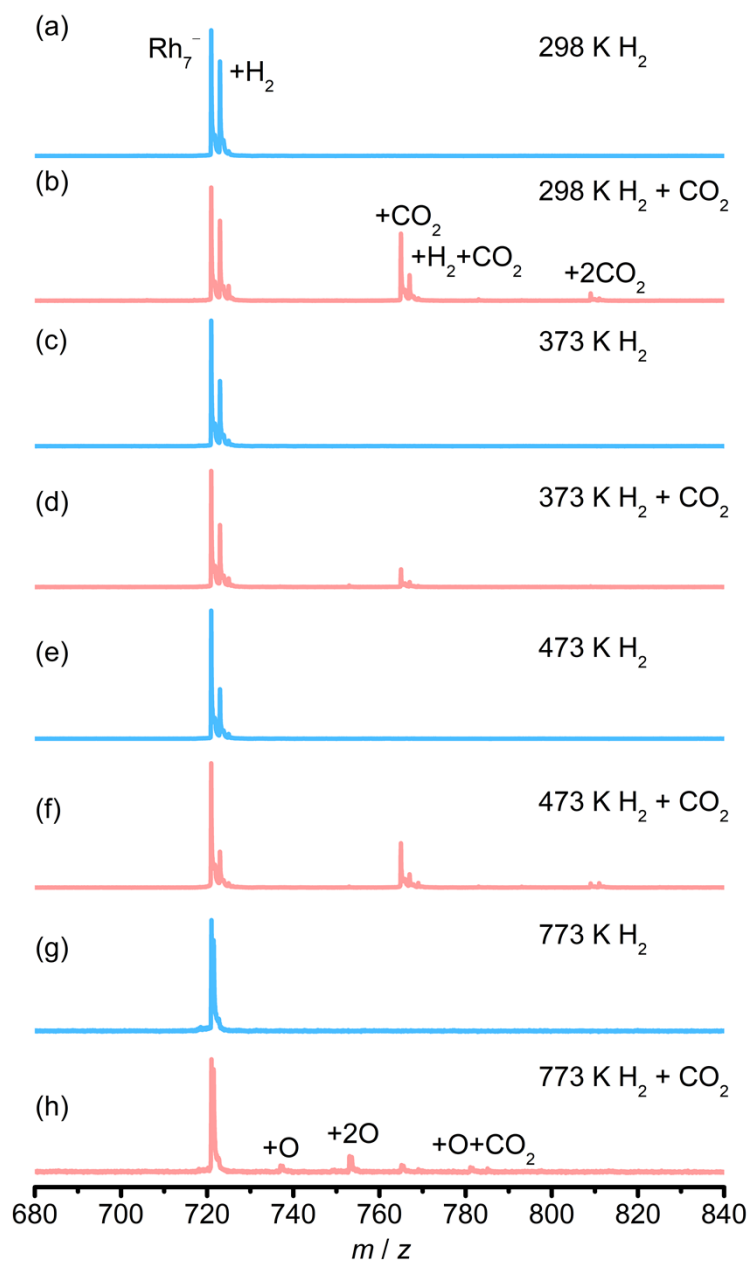

**Fig. S25** The TOF mass spectra for the reactions of mass-selected  $\text{Rh}_7^-$  clusters with  $\text{H}_2$  at 298 K (a), 373 K (c), 473 K (e) and 773 K (g), with  $\text{H}_2 + \text{CO}_2$  at 298 K (b), 373 K (d), 473 K (f) and 773 K (h) in the single ion trap experiment in which  $\text{H}_2$  and  $\text{CO}_2$  are delivered into the same ion trap. The maximum molecule density of reactant gases is about  $16 \times 10^{12}$  (a),  $24 \times 10^{12}$  (c),  $36 \times 10^{12}$  (e),  $33 \times 10^{12}$  (g) for  $\text{H}_2$  and  $1.3 \times 10^{12}$  (b),  $1.2 \times 10^{12}$  (d),  $5.6 \times 10^{12}$  (f),  $34 \times 10^{12}$  molecules  $\text{cm}^{-3}$  (h) for  $\text{CO}_2$ . The  $\text{Rh}_7\text{X}^-$  ( $\text{X} = \text{H}_2, \text{CO}_2$ , etc) species are labeled as  $+\text{X}$ .

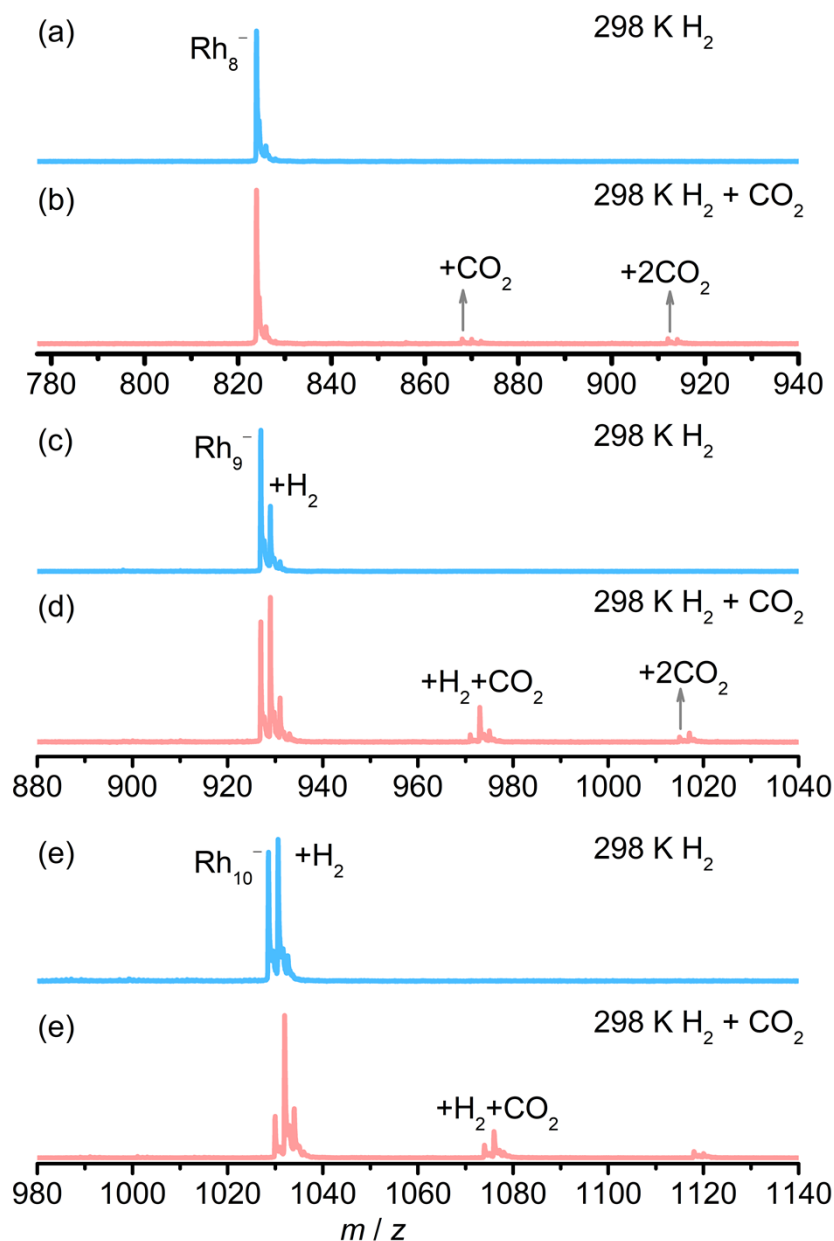

**Fig. S26** The TOF mass spectra for the reactions of mass-selected Rh<sub>8</sub><sup>-</sup> clusters with H<sub>2</sub> at 298 K (a), with H<sub>2</sub> + CO<sub>2</sub> at 298 K (b), Rh<sub>9</sub><sup>-</sup> clusters with H<sub>2</sub> at 298 K (c), with H<sub>2</sub> + CO<sub>2</sub> at 298 K (d), Rh<sub>10</sub><sup>-</sup> clusters with H<sub>2</sub> at 298 K (e), with H<sub>2</sub> + CO<sub>2</sub> at 298 K (f) in the single ion trap experiment in which H<sub>2</sub> and CO<sub>2</sub> are delivered into the same ion trap. The maximum molecule density of reactant gases is about  $37 \times 10^{12}$  (a),  $26 \times 10^{12}$  (c),  $24 \times 10^{12}$  (e) for H<sub>2</sub> and  $19 \times 10^{12}$  (b),  $9.9 \times 10^{12}$  (d),  $4.3 \times 10^{12}$  molecules cm<sup>-3</sup> (f) for CO<sub>2</sub>. The Rh<sub>*n*</sub>X<sup>-</sup> (X = H<sub>2</sub>, CO<sub>2</sub>, etc) species are labeled as +X.

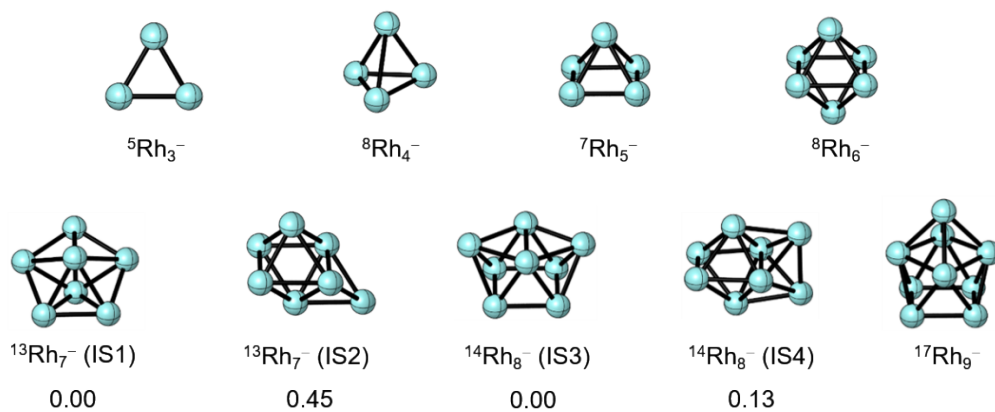

**Fig. S27** The DFT-calculated lowest-lying isomers of  $\text{Rh}_n^-$  ( $n = 3-9$ ) at the PBE level. The higher energy isomers of  $\text{Rh}_7^-$  and  $\text{Rh}_8^-$  could have also been produced in the experiment<sup>1</sup> and calculated, and their relative energies (in eV, zero-point vibrational corrected) are listed below each isomer.

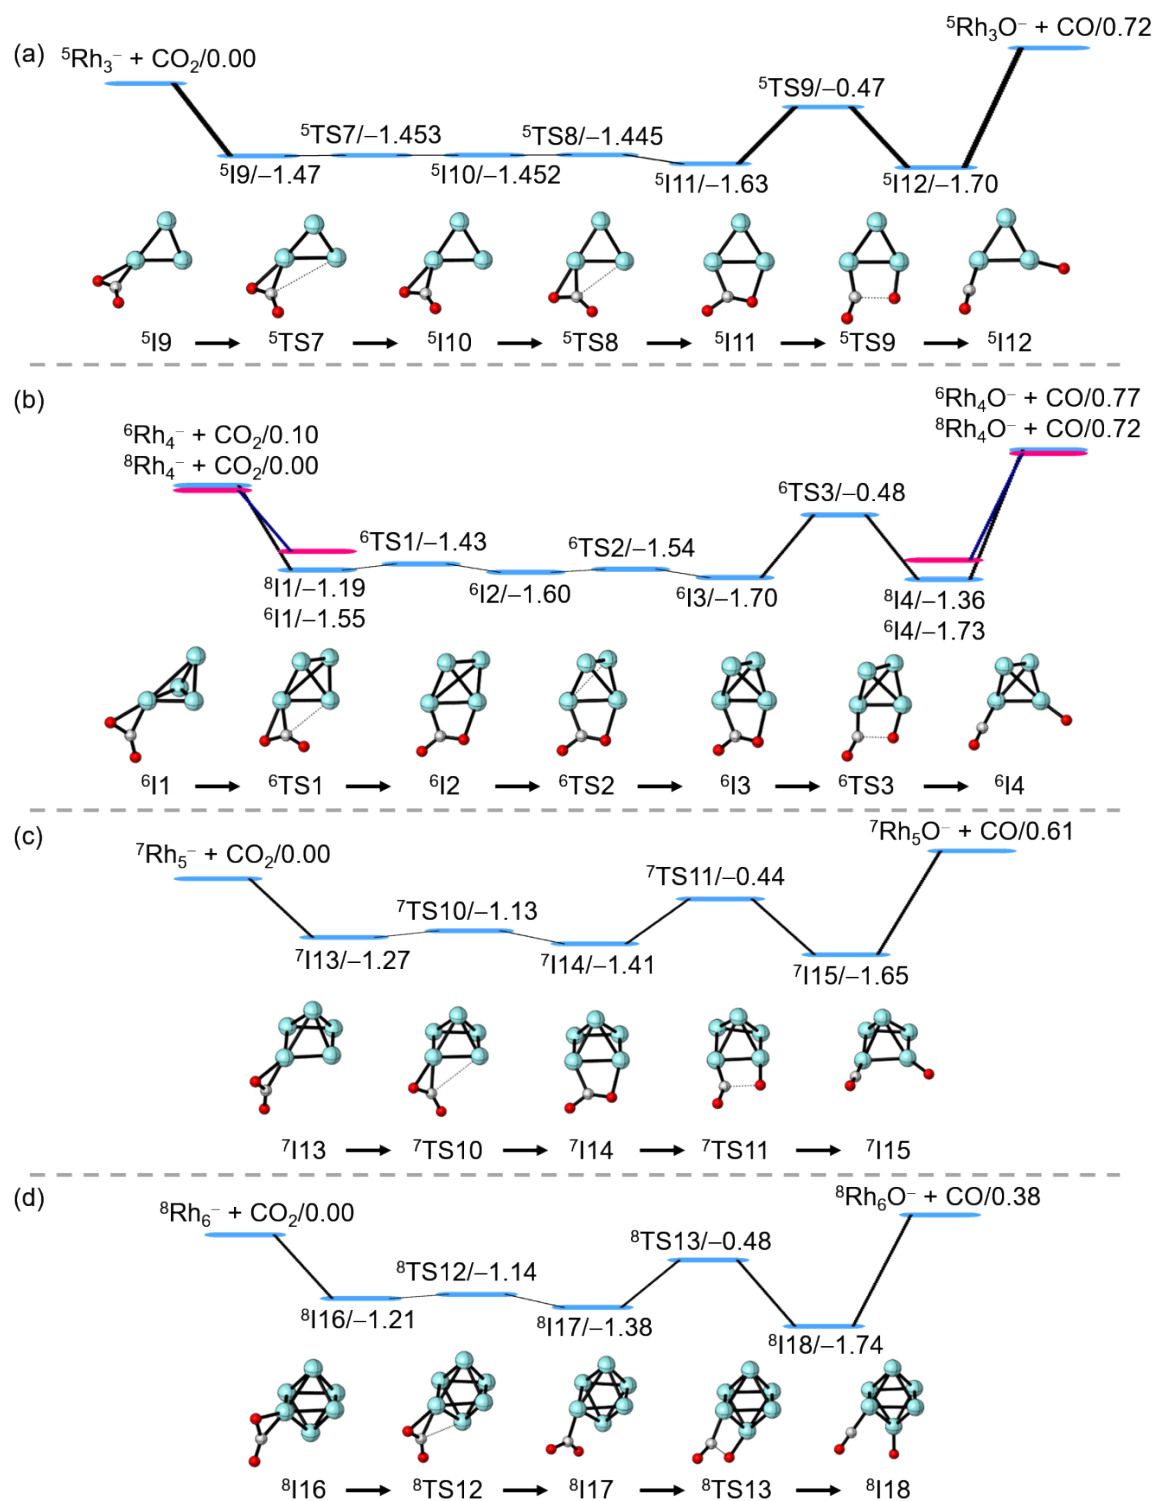

**Fig. S28** The DFT calculated potential energy profiles for reactions  $\text{Rh}_3^- + \text{CO}_2$  (a),  $\text{Rh}_4^- + \text{CO}_2$  (b),  $\text{Rh}_5^- + \text{CO}_2$  (c), and  $\text{Rh}_6^- + \text{CO}_2$  (d). The zero-point vibration corrected energies ( $\Delta H_0$ , eV) are given. The superscripts represent the spin multiplicities.

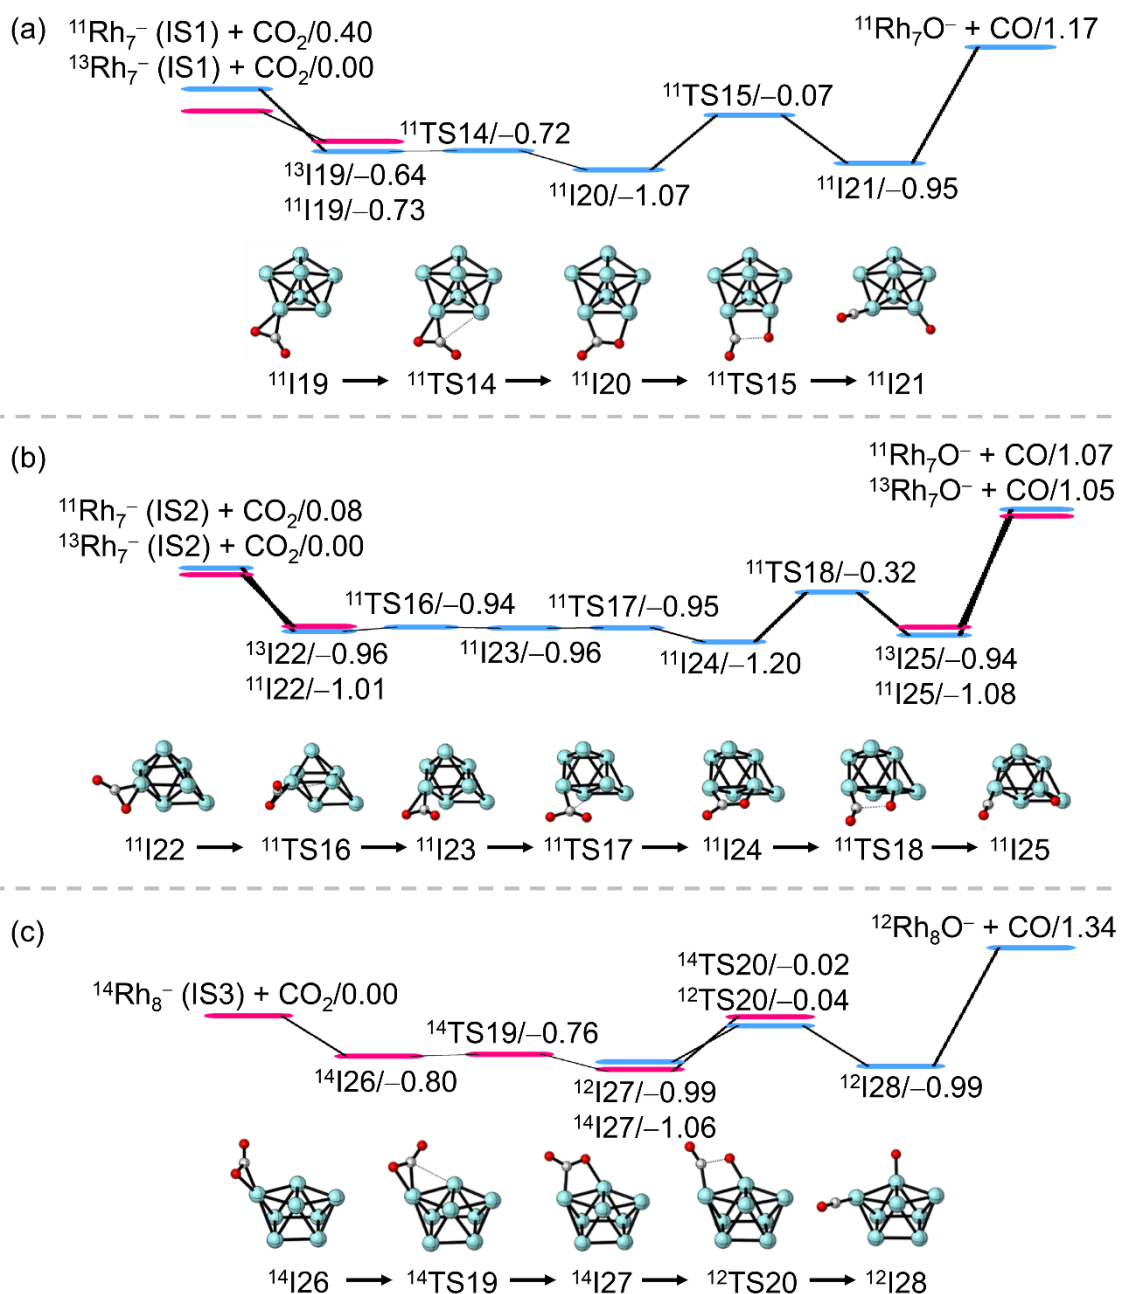

**Fig. S29** The DFT calculated potential energy profiles for reactions  $\text{Rh}_7^-$  (IS1) +  $\text{CO}_2$  (a),  $\text{Rh}_7^-$  (IS2) +  $\text{CO}_2$  (b), and  $\text{Rh}_8^-$  (IS3) +  $\text{CO}_2$  (c). The zero-point vibration corrected energies ( $\Delta H_0$ , eV) are given. The superscripts represent the spin multiplicities.

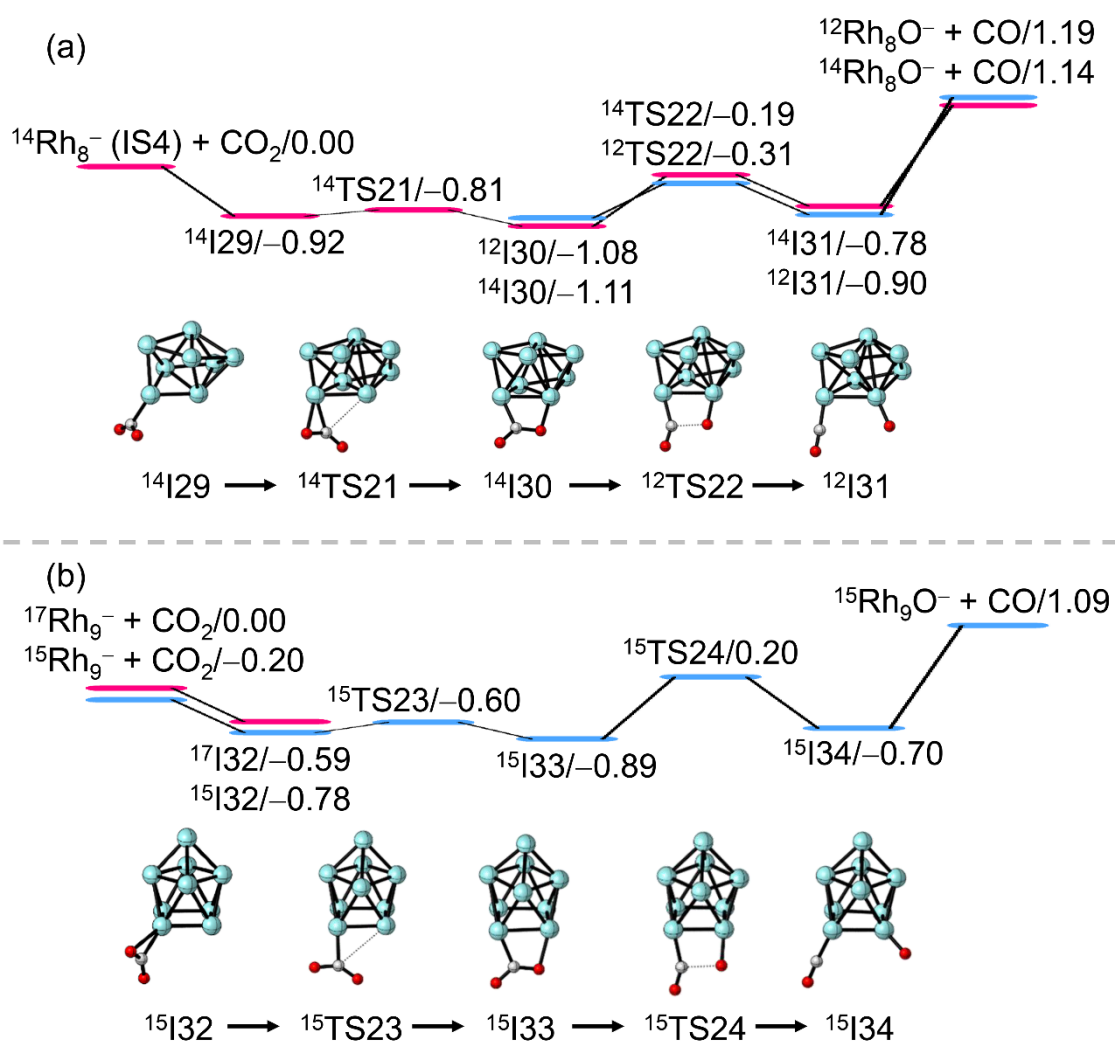

**Fig. S30** The DFT calculated potential energy profiles for reactions  $\text{Rh}_8^- (\text{IS4}) + \text{CO}_2$  (a) and  $\text{Rh}_9^- + \text{CO}_2$  (b). The zero-point vibration corrected energies ( $\Delta H_0$ , eV) are given. The superscripts represent the spin multiplicities.

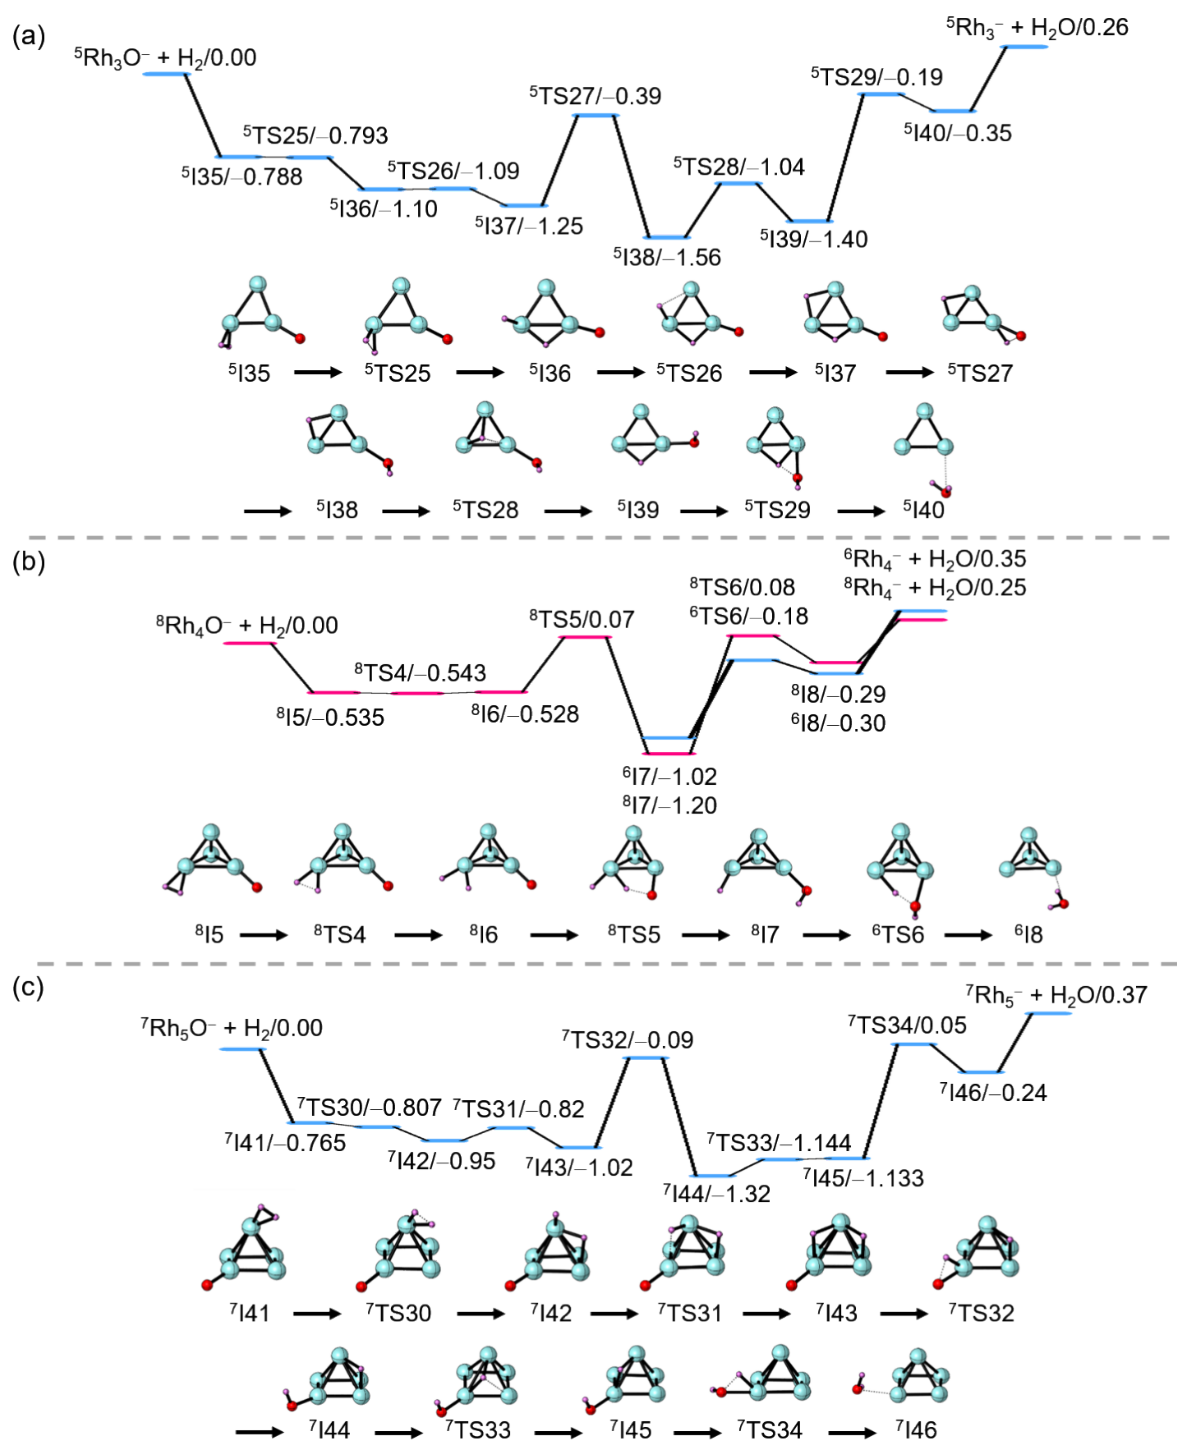

**Fig. S31** The DFT calculated potential energy profiles for reactions  $\text{Rh}_3\text{O}^- + \text{H}_2$  (a),  $\text{Rh}_4\text{O}^- + \text{H}_2$  (b) and  $\text{Rh}_5\text{O}^- + \text{H}_2$  (c). The zero-point vibration corrected energies ( $\Delta H_0$ , eV) are given. The superscripts represent the spin multiplicities.



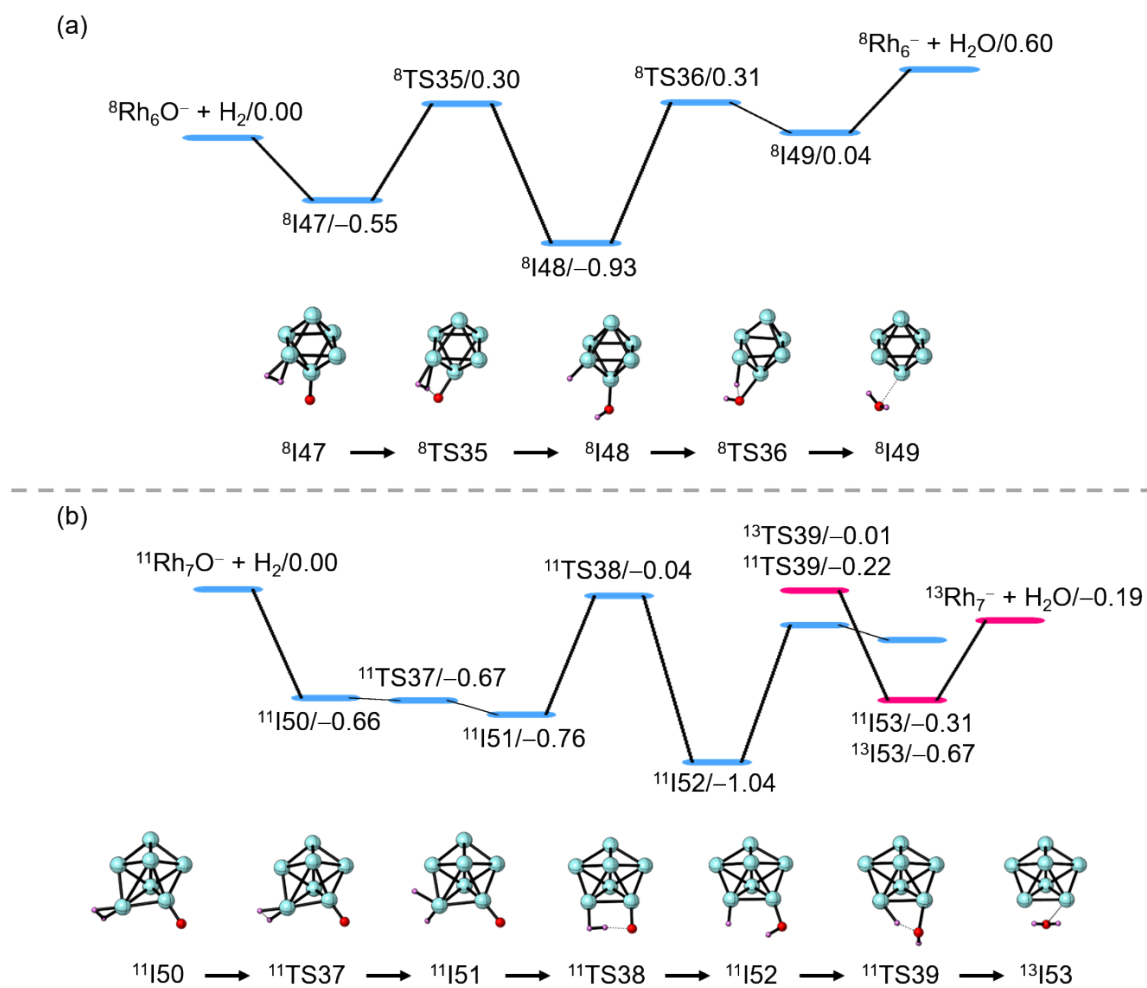

**Fig. S32** The DFT calculated potential energy profiles for reactions  $\text{Rh}_6\text{O}^- + \text{H}_2$  (a) and  $\text{Rh}_7\text{O}^- + \text{H}_2$  (b). The zero-point vibration corrected energies ( $\Delta H_0$ , eV) are given. The superscripts represent the spin multiplicities.

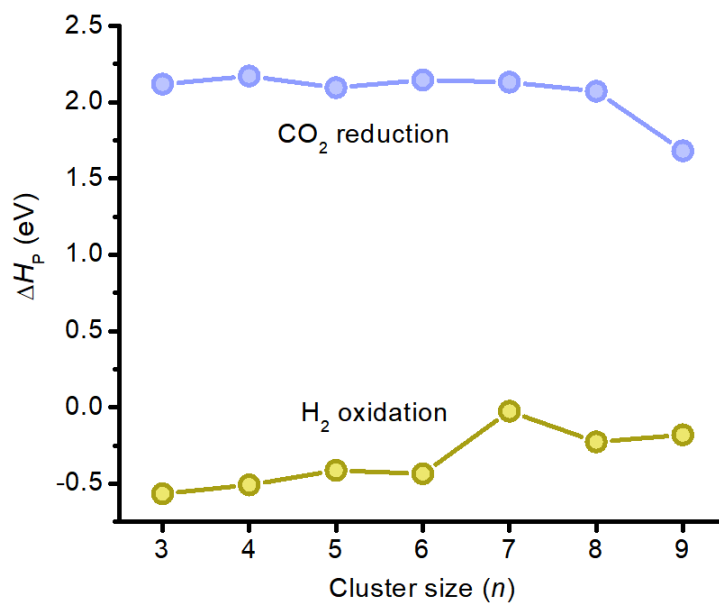

**Fig. S33** The DFT calculated thermodynamics for reactions  $\text{Rh}_n\text{H}_2^- (n = 3-9) + \text{CO}_2 \rightarrow \text{Rh}_n\text{CO}^- + \text{H}_2\text{O}$  and  $\text{Rh}_n\text{H}_2^- + \text{CO}_2 \rightarrow \text{Rh}_n^- + \text{CO} + \text{H}_2\text{O}$  at 0 K.

## References

- 1 M. R. Beltrán, F. Buendía Zamudio, V. Chauhan, P. Sen, H. Wang, Y. J. Ko and K. Bowen, *Eur. Phys. J. D*, 2013, **67**, 63.
